# Supplementary material for: Precursor peptide-targeted mining of more than one hundred thousand genomes expands the lanthipeptide natural product family
Source: PubMed Central journal article supplement (PMC7268733; doi:10.1186/s12864-020-06785-7), 2020-06-03
Supplement: 12864_2020_6785_MOESM1_ESM.pdf [file 12864_2020_6785_MOESM1_ESM.pdf]

## **Precursor peptide-targeted mining of more than one hundred thousand genomes expands the lanthipeptide natural product family**

Mark C. Walker,<sup>1,2\*</sup> Sara Eslami<sup>2</sup>, Kenton J. Hetrick<sup>2</sup>, Sarah E. Ackenhusen<sup>2</sup>, Douglas A. Mitchell,<sup>2,3,4</sup> Wilfred A. van der Donk<sup>2,3,5</sup>

<sup>1</sup>Department of Chemistry and Chemical Biology, University of New Mexico, 346 Clark Hall, 300 Terrace St. NE, Albuquerque, New Mexico 87131, United States.

<sup>2</sup>Department of Chemistry, University of Illinois at Urbana-Champaign, Roger Adams Laboratory, 600 S. Mathews Ave., Urbana, Illinois 61801, United States.

<sup>3</sup>Carl R. Woese Institute for Genomic Biology, University of Illinois, Urbana, Illinois 61801, United States.

<sup>4</sup>Department of Microbiology, University of Illinois at Urbana-Champaign, 601 S. Goodwin Ave., Urbana, Illinois 61801, United States.

<sup>5</sup>Howard Hughes Medical Institute, University of Illinois at Urbana-Champaign, 600 S. Mathews Ave., Urbana, Illinois 61801, United States.

\*To whom correspondence should be addressed. E-mail: [markewalker@unm.edu](mailto:markewalker@unm.edu)

### ORCID:

|                         |                     |
|-------------------------|---------------------|
| Mark C. Walker          | 0000-0003-3942-003X |
| Sara M. Eslami          | 0000-0003-3397-0583 |
| Kenton J. Hetrick       | 0000-0003-4657-5275 |
| Sarah E. Ackenhusen     | 0000-0002-7412-575X |
| Douglas A. Mitchell     | 0000-0002-9564-0953 |
| Wilfred A. van der Donk | 0000-0002-5467-7071 |

## **Supplementary Figures and Tables**

|                                                                                                        |    |
|--------------------------------------------------------------------------------------------------------|----|
| <b>Supplementary Figure S1.</b> Features calculated for precursor peptides                             | 3  |
| <b>Supplementary Table S1.</b> Features and scoring for class I precursors                             | 4  |
| <b>Supplementary Table S2.</b> Features and scoring for class II precursors                            | 4  |
| <b>Supplementary Table S3.</b> Features and scoring for class III precursors                           | 4  |
| <b>Supplementary Table S4.</b> Features and scoring for class IV precursors                            | 4  |
| <b>Supplementary Figure S2.</b> Sequence motifs in precursor peptides                                  | 5  |
| <b>Supplementary Figure S3.</b> Sequence similarity network of precursor peptides                      | 6  |
| <b>Supplementary Table S5.</b> Location of characterized lanthipeptides in sequence similarity network | 7  |
| <b>Supplementary Figure S4.</b> Sequence logos of class I precursor families                           | 8  |
| <b>Supplementary Figure S5.</b> Sequence logos of class II precursor families                          | 10 |
| <b>Supplementary Figure S6.</b> Sequence logos of class III precursor families                         | 12 |
| <b>Supplementary Figure S7.</b> Sequence logos of class IV precursor families                          | 14 |
| <b>Supplementary Table S6.</b> Abundant protein families in class I biosynthetic gene clusters         | 15 |
| <b>Supplementary Table S7.</b> Abundant protein families in class II biosynthetic gene clusters        | 15 |
| <b>Supplementary Table S8.</b> Abundant protein families in class III biosynthetic gene clusters       | 16 |

|                                                                                                                          |    |
|--------------------------------------------------------------------------------------------------------------------------|----|
| <b>Supplementary Table S9.</b> Abundant protein families in class IV biosynthetic gene clusters                          | 16 |
| <b>Supplementary Table S10.</b> Distribution of abundant protein families among lanthipeptide biosynthetic gene clusters | 17 |
| <b>Supplementary Figure S8.</b> Representative lanthipeptide biosynthetic gene clusters with abundant protein families   | 18 |
| <b>Supplementary Table S11.</b> Distribution of select protein families in lanthipeptide biosynthetic gene clusters      | 26 |
| <b>Supplementary Figure S9.</b> Representative lanthipeptide biosynthetic gene clusters with select protein families     | 27 |
| <b>Supplementary Figure S10.</b> Phylogenetic distribution of genomes used in this study                                 | 33 |
| <b>Supplementary Figure S11.</b> Phylogenetic tree of LanC-like proteins including human LanC-like proteins              | 34 |
| <b>Supplementary Figure S12.</b> GC content of biosynthetic gene clusters and their cognate genomes                      | 35 |
| <b>Supplementary Figure S13.</b> ESI MS/MS and bioactivity of birimositide $\alpha$ and $\beta$                          | 36 |
| <b>Supplementary Table S12.</b> Expected and observed monoisotopic masses for Brt $\alpha$ and Brt $\beta$               | 37 |
| <b>References.</b>                                                                                                       | 38 |

**Supplementary Figure S1.** Features calculated to score precursor peptides. The DNA sequence encoding 7 genes upstream and downstream of a LanC-like domain containing protein was extracted and all potential open reading frames (ORFs) were identified. In the case that multiple potential ORFs shared a stop codon, the longest ORF within the expected range of LanA lengths was used. These ORFs were discarded if they were too long, too short, occurred entirely within an annotated gene, or did not contain a Cys residue. The remaining ORFs were then analyzed using FIMO [1] to identify conserved leader motifs. If the ORF contained a leader motif and has a GG, GA, or S/T (x)<sub>2-7</sub>C motif downstream of the leader, but not within 10 residues of the end of the ORF, the approximate core was identified as starting immediately after the GG or GA motif or 1 residue before the S/T (x)<sub>2-7</sub>C motif. If the ORF contained multiple GG or GA motifs, only the first one was considered, likewise with the S/T (x)<sub>2-7</sub>C motif. If the ORF contained both a GG or GA motif and a S/T (x)<sub>2-7</sub>C motif, the longer potential core was used. If the ORF did not contain a GG, GA, or S/T (x)<sub>2-7</sub>C motif, or those motifs were within 10 residues of the end of the ORF, the C-terminal half of the peptide was identified as the potential core. If no leader peptide motif was identified in the ORF, the same analysis was performed starting from the beginning of the ORF instead of after the leader motif. Finally, if the predicted core did not contain a Cys residue, the ORF was discarded. The given features were then calculated for each potential ORF.

### Identify gene cluster

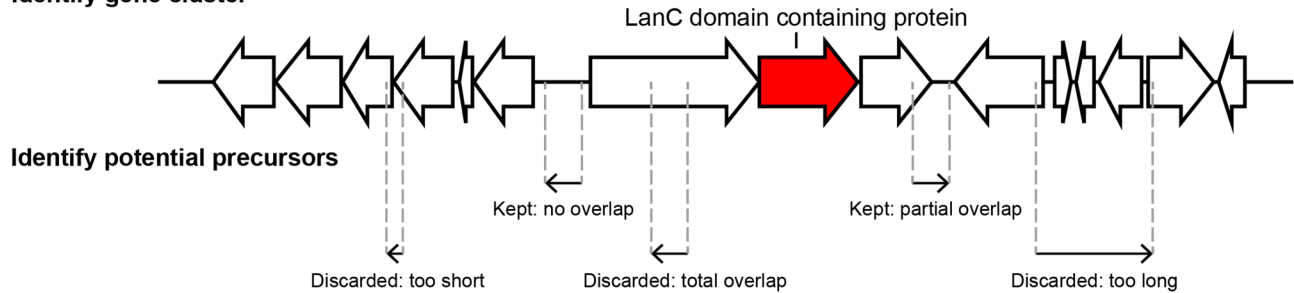

### Predict potential core peptides

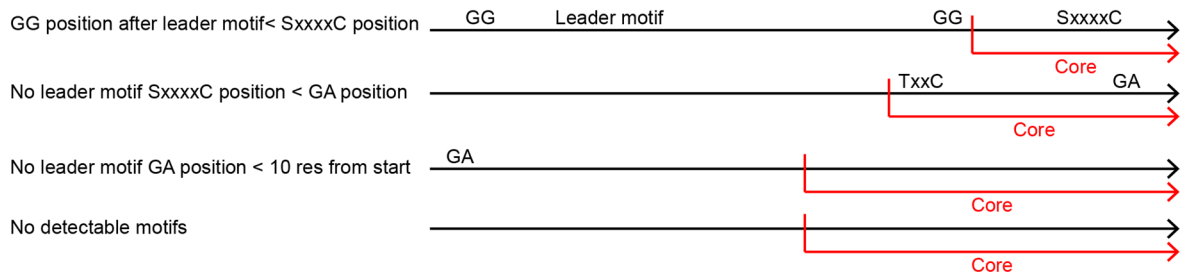

### Score potential core peptides

|                                      |                                          |                                          |
|--------------------------------------|------------------------------------------|------------------------------------------|
| Molecular weight of core             | Core fraction that is Cys                | Second fifth of precursor fraction S+T+C |
| Isoelectric point of core            | Core fraction that is Ser + Thr          | Second fifth of precursor fraction C     |
| Number of each amino acid in core    | Core fraction that is Ser + Thr + Cys    | Third fifth of precursor fraction S+T    |
| Number of Ser + Thr in core          | Core fraction that is charged residues   | Third fifth of precursor fraction S+T+C  |
| Number of Ser + Thr + Cys in core    | Core fraction that is positive residues  | Third fifth of precursor fraction C      |
| Number of Charged residues in core   | Core fraction that is negative residues  | Fourth fifth of precursor fraction S+T   |
| Number of positive charges in core   | Core fraction that is polar residues     | Fourth fifth of precursor fraction S+T+C |
| Number of negative charges in core   | Core fraction that is aliphatic residues | Fourth fifth of precursor fraction C     |
| Net charge of core                   | First fifth of precursor fraction S+T    | Fifth fifth of precursor fraction S+T    |
| Number of polar residues in core     | First fifth of precursor fraction S+T+C  | Fifth fifth of precursor fraction S+T+C  |
| Number of aliphatic residues in core | First fifth of precursor fraction C      | Fifth fifth of precursor fraction C      |
| Number of aromatic residues in core  | Second fifth of precursor fraction S+T   |                                          |

### Number of amino acid pairs

AA, AC, AD, ..., AW, AY AxA, AxC, AxD, ..., AxW, AxY ... AxxxxxA, AxxxxxC, AxxxxxD, ..., AxxxxxW, AxxxxxY  
 CA, CC, CD, ..., CW, CY CxA, CxC, CxD, ..., CxW, CxY ... CxxxxxA, CxxxxxC, CxxxxxD, ..., CxxxxxW, CxxxxxY  
 ⋮ ⋮ ⋮  
 WA, WC, WD, ..., WW, WY WxA, WxC, WxD, ..., WxW, WxY ... WxxxxxA, WxxxxxC, WxxxxxD, ..., WxxxxxW, WxxxxxY  
 YA, YC, YD, ..., YW, YY YxA, YxC, YxD, ..., YxW, YxY ... YxxxxxA, YxxxxxC, YxxxxxD, ..., YxxxxxW, YxxxxxY

**Supplementary Table S1.** Features and scoring for class I precursors. ORFs were identified as precursors if their score was over 10. SVM, support vector machine.

| <b>Feature</b>                                       | <b>Score</b> |
|------------------------------------------------------|--------------|
| SVM classification                                   | 5            |
| Presence of Class I leader peptide MEME motif        | 5            |
| Core pI less than 9                                  | 2            |
| 2 or more Cys in core                                | 2            |
| Leader has KLxLxK MEME motif and ends in GG sequence | 1            |

**Supplementary Table S2.** Features and scoring for class II precursors. ORFs were identified as precursors if their score was over 10.

| <b>Feature</b>                                 | <b>score</b> |
|------------------------------------------------|--------------|
| SVM classification                             | 5            |
| Presence of Class II leader peptide MEME motif | 5            |
| 2 or more Cys in core                          | 2            |
| Hits a Pfam* hidden Markov model               | 5            |
| Precursor ends with sequence KRC               | 4            |

\*PF08130.1, PF04604.12, PF14867.5, PF16934.4, PF02979.15, PF07862.10

**Supplementary Table S3.** Features and scoring for class III precursors. ORFs were identified as precursors if their score was over 10.

| <b>Feature</b>                                  | <b>score</b> |
|-------------------------------------------------|--------------|
| SVM classification                              | 5            |
| Presence of Class III leader peptide MEME motif | 5            |
| 2 or more Cys in core                           | 2            |
| Has SxxSxxx motif                               | 1            |
| Has SxxSxxC motif                               | 1            |
| Core pI is between 3 and 9                      | 1            |

**Supplementary Table S4.** Features and scoring for class IV precursors. ORFs were identified as precursors if their score was over 10.

| <b>Feature</b>                                 | <b>score</b> |
|------------------------------------------------|--------------|
| SVM classification                             | 5            |
| Presence of Class IV leader peptide MEME motif | 5            |
| 2 or more Cys in core                          | 2            |
| Precursor ends with sequence GCD               | 1            |
| Precursor ends with sequence LGS               | 1            |

**Supplementary Figure S2.** Sequence motifs present in more than 100 lanthipeptide precursor peptides. Some of the conserved leader peptide motifs have been shown to be important for the cognate lanthipeptide synthases (FxLD in class I [2]; E/D(-8)L/M(-9) in class II [3]; LxLQ in class III [4], and Lx<sub>2</sub>LPE in class IV [5]). Lipid II-binding motifs, which arise for likely antibiotic lanthipeptides are underlined in red.

### Leader motifs

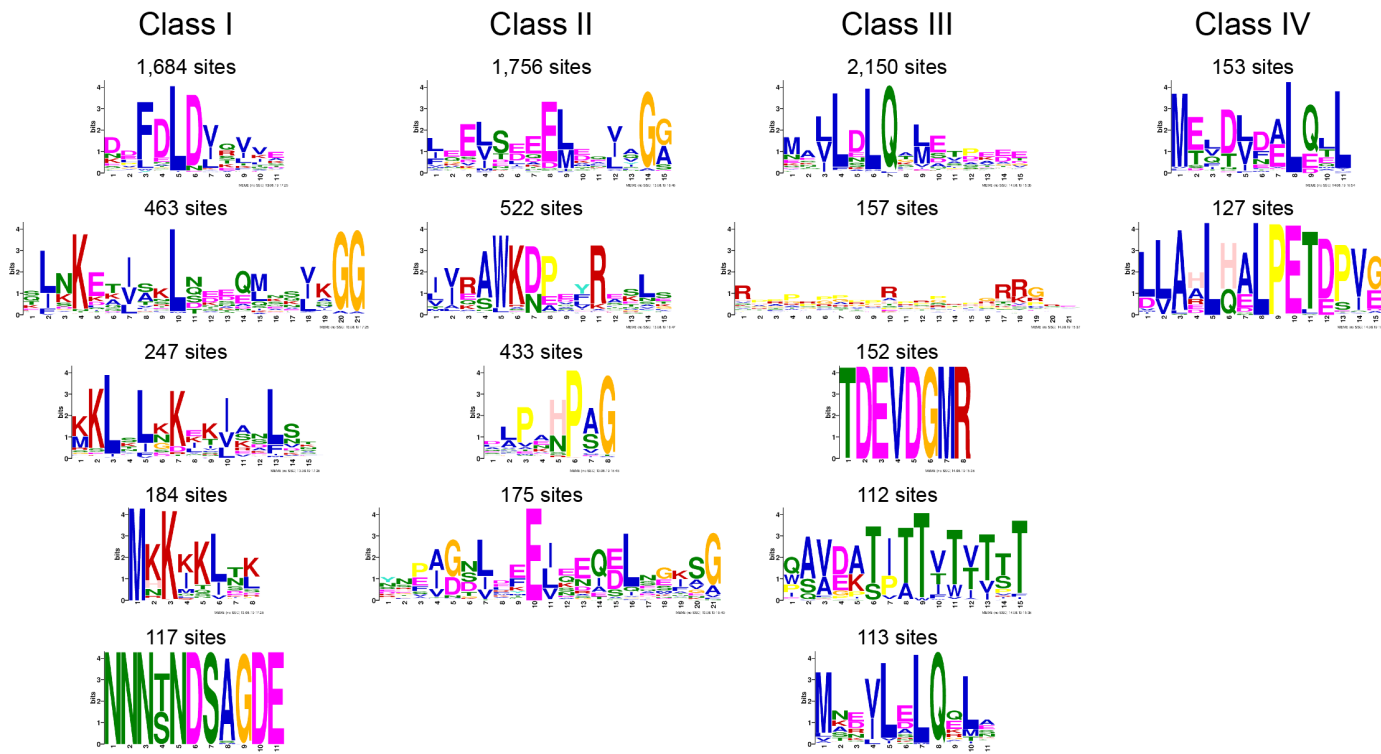

### Core motifs

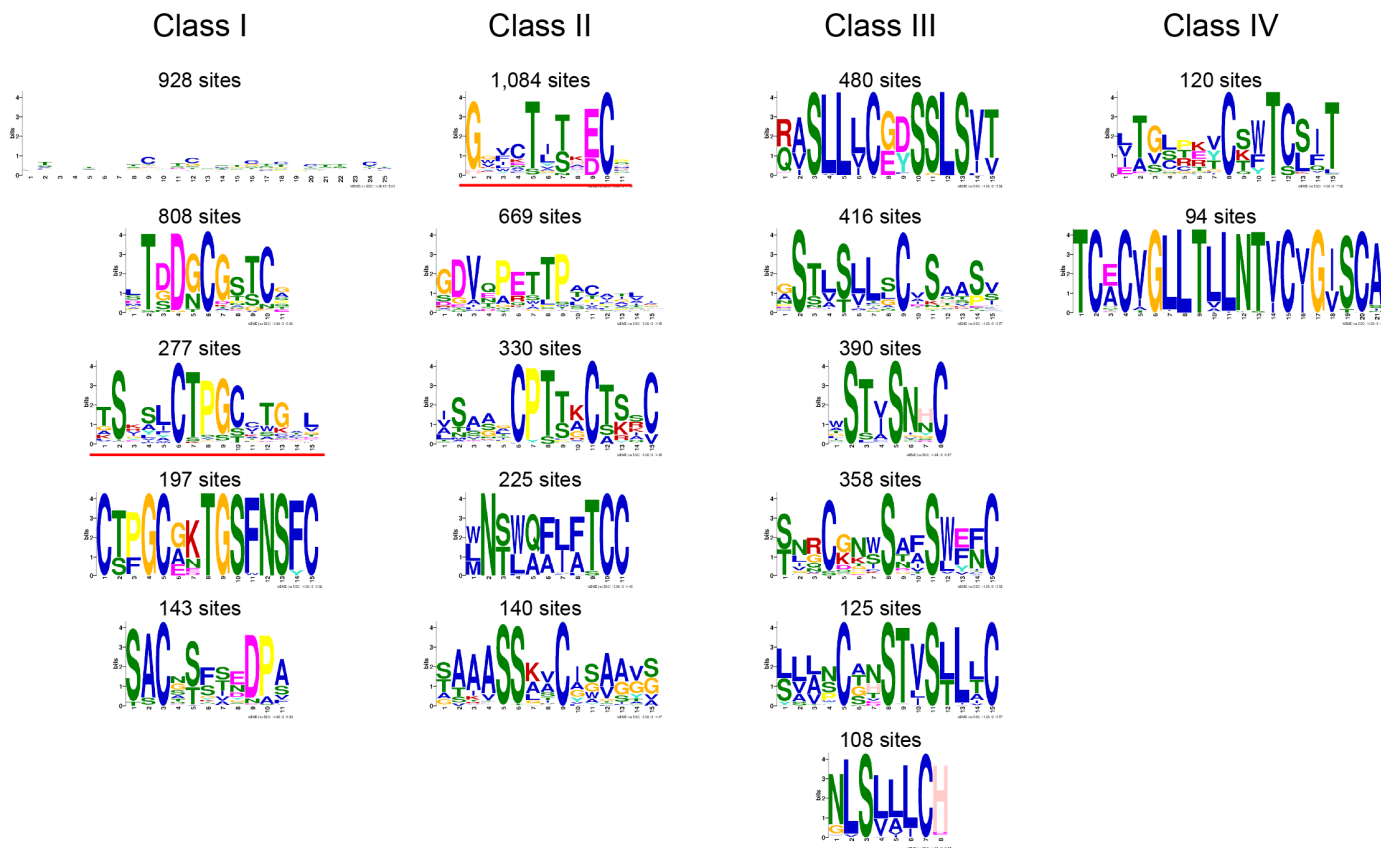

**Supplementary Figure S3.** Sequence similarity network of predicted precursor peptides generated with the Enzyme Function Initiative-Enzyme Similarity Tool [6] with permissive similarity cutoff (alignment score: 6; equivalent to an expectation value of  $10^{-6}$ ) and visualized in Cytoscape [7].

Colored by prokaryotic phylum

Colored by lanthipeptide class

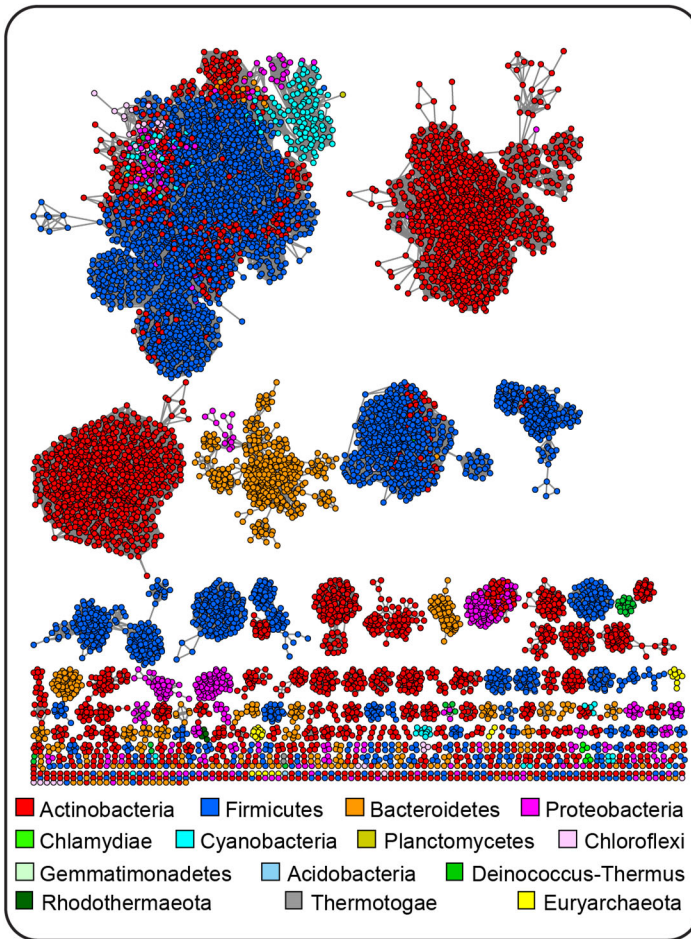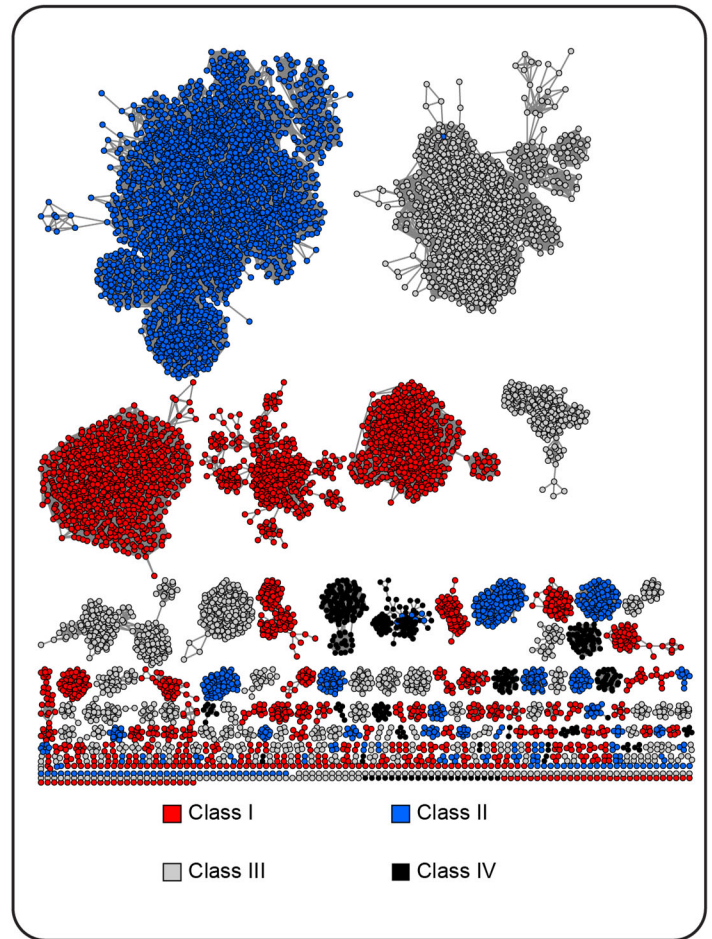

**Supplementary Table S5.** Location of top BLAST hits of known lanthipeptides from the MIBiG [8] and BAGEL [9] databases in the sequence similarity networks presented in Figure 2. If the precursor is located in a cluster with more than 20 members, the identifier of that cluster is given. If the precursor is located in a cluster with 20 or fewer members, the label from Figure 2 is given. If the precursor occurred only once, it is annotated as a singleton.

| Known Lanthipeptide      | Cluster          |
|--------------------------|------------------|
| AmfS                     | III 1            |
| BacCH91                  | I 5              |
| BhtA1                    | BhtA1            |
| BhtA2                    | BhtA2            |
| Bicereucin_beta          | II 33            |
| BLD_1648                 | BLD_1648         |
| Bovicin_HJ50             | Bovicin HJ50     |
| BsaA2                    | I 5              |
| Carnolysin_A1            | II 16            |
| Carnolysin_A2            | II 16            |
| Catenulipeptide          | singleton        |
| Cerecidin                | II 3             |
| Cinnamycin_B             | Cinnamycin B     |
| Cyll <sub>L</sub>        | II 46            |
| Cyll <sub>S</sub>        | II 3             |
| Curvopeptin              | singleton        |
| Divamide*                | Cinnamycin B     |
| Duramycin*               | Cinnamycin B     |
| Entianin                 | I 7              |
| Epidermin                | I 5              |
| Ericin_A                 | I 7              |
| Ericin_S                 | I 7              |
| Erythreapeptin           | III 4            |
| Flavecin_A1              | Flavecin A1      |
| Flavucin                 | Flavucin         |
| Gallidermin              | I 5              |
| Geobacillin_I            | I 7              |
| Geobacillin_II           | Geobacillin II   |
| Griseopeptin             | III 1            |
| Haloduracin_alpha        | II 4             |
| Haloduracin_beta         | Haloduracin_beta |
| Informatipeptin          | III 2            |
| Lacticin 3147 $\alpha$ * | II 9             |
| Lacticin 3147 $\beta$ *  | II 6             |
| Lacticin 481*            | II 1             |
| Lichenicidin_VK21_A1     | II 4             |
| Lichenicidin_VK21_A2     | II 7             |
| Macedocin                | II 1             |
| Macedovicin              | Bovicin HJ50     |
| McdA1                    | II 1             |
| Mersacidin               | Mersacidin       |
| Michiganin A             | Michiganin A     |
| Microbisporicin          | Microbisporicin  |
| Mutacin 1140*            | I 5              |
| Mutacin II               | II 1             |
| Mutacin K8               | II 1             |
| Nisin_A                  | I 7              |

| Known Lanthipeptide      | Cluster          |
|--------------------------|------------------|
| Nisin_O                  | I 7              |
| Nisin_U                  | I 7              |
| Nisin_Z                  | I 7              |
| Nukacin_ISK-1            | II 1             |
| Paenibacillin            | Paenibacillin    |
| Paenicidin_A             | Paenicidin A     |
| Paenicidin_B             | Paenicidin A     |
| Paenilan                 | I 20             |
| Penisin                  | I 23             |
| Pinensin                 | I 17             |
| Plantaricin C            | Plantaricin C    |
| Pneumolancidin_PIdA2     | II 11            |
| Pneumolancidin_PIdA3     | II 11            |
| Pneumolancidin_PIdA4     | II 11            |
| Prochlorosin_1.1         | Prochlorosin 1.1 |
| Pseudomycoicidin         | Geobacillin II   |
| Roseocin $\alpha$        | II 29            |
| Roseocin $\beta$         | II 2             |
| Ruminococcin_A           | II 1             |
| SAL-2242                 | III 1            |
| Salivaricin_9            | II 1             |
| Salivaricin_A            | II 14            |
| Salivaricin_G32          | II 1             |
| Sap_T                    | I 21             |
| SapB                     | III 1            |
| Smb_A                    | BhtA2            |
| Smb_B                    | BhtA1            |
| SRO15-2212               | III 1            |
| SRO15-3108               | II 2             |
| Stackepeptin_A           | singleton        |
| Stackepeptin_B           | singleton        |
| Stackepeptin_C           | singleton        |
| Stackepeptin_D           | singleton        |
| Staphylococcin_C55_alpha | II 9             |
| Staphylococcin_C55_beta  | II 6             |
| Streptin                 | I 14             |
| Streptococcin_A-FF22     | II 1             |
| StreptococcinA-M49       | II 1             |
| Subtilin                 | I 7              |
| Subtilomycin             | Subtilomycin     |
| Suicin_3908              | Bovicin HJ50     |
| Suicin_65                | II 1             |
| Suicin_90-1330           | I 7              |
| Thermophilin_1277        | Bovicin HJ50     |
| Thusin_A                 | II 4             |
| Thusin_B                 | Thusin B         |

\*top blast hit is not identical, possibly because the genome of the producer is not in the database.





I 13

n = 56

M I N E K N L F D L D V Q V T T T A G D V D P Q I T S V S A C T P G C G N T G S F N S F C C

I 14

n = 36

M N Z N T I K D F D L D L K T Z K K K D T A P V G S R Y L C T P G S C W K L V C F T T T V K

I 16

n = 33

M N K E L F D L D I N K K M E T P T E M T A Q T W T T V K V S K A V C K T G T C I C T T S C S N C K

I 17

n = 50

M E I N D N I Z N K M K L L E D L K I E S F V T S A L D S K D E L S V A K R L S G G L G N S A A G D H S H P T H T I M K T D D R L H H T P P H V C T I V I C

I 20

n = 27

M K N Q F D L D L Q V A K N E V A P K V Q P A S G L I C T P S C A T G T L N C Q V S L S F C K T C

I 21

n = 23

M P E L T E L D T L S D L P E R T S D L P S A A Y T G C S G L C T I V C T V V I C G V C

I 23

n = 23

M A N N F D L D V V K S V N S V N N F G L Y T S C Y S S Q C Y S S K C Y S D S C Y S S C Y T G R H M C G Y T H G Y S C

I 31

n = 21

M E N T E F S L E L D V T E V A T E Q D Y V S S G V T S T G C C K N

**Supplementary Figure S5.** Sequence logos generated from alignments of class II precursor peptides in clusters with 20 or more members (in Figure 2) using WebLogo [10]. Conserved leader motifs that are shared among multiple clusters (from Figure S2) are boxed in gray and potential lipid II-binding motifs are overlined in red. Families with no previously characterized members are highlighted in yellow.

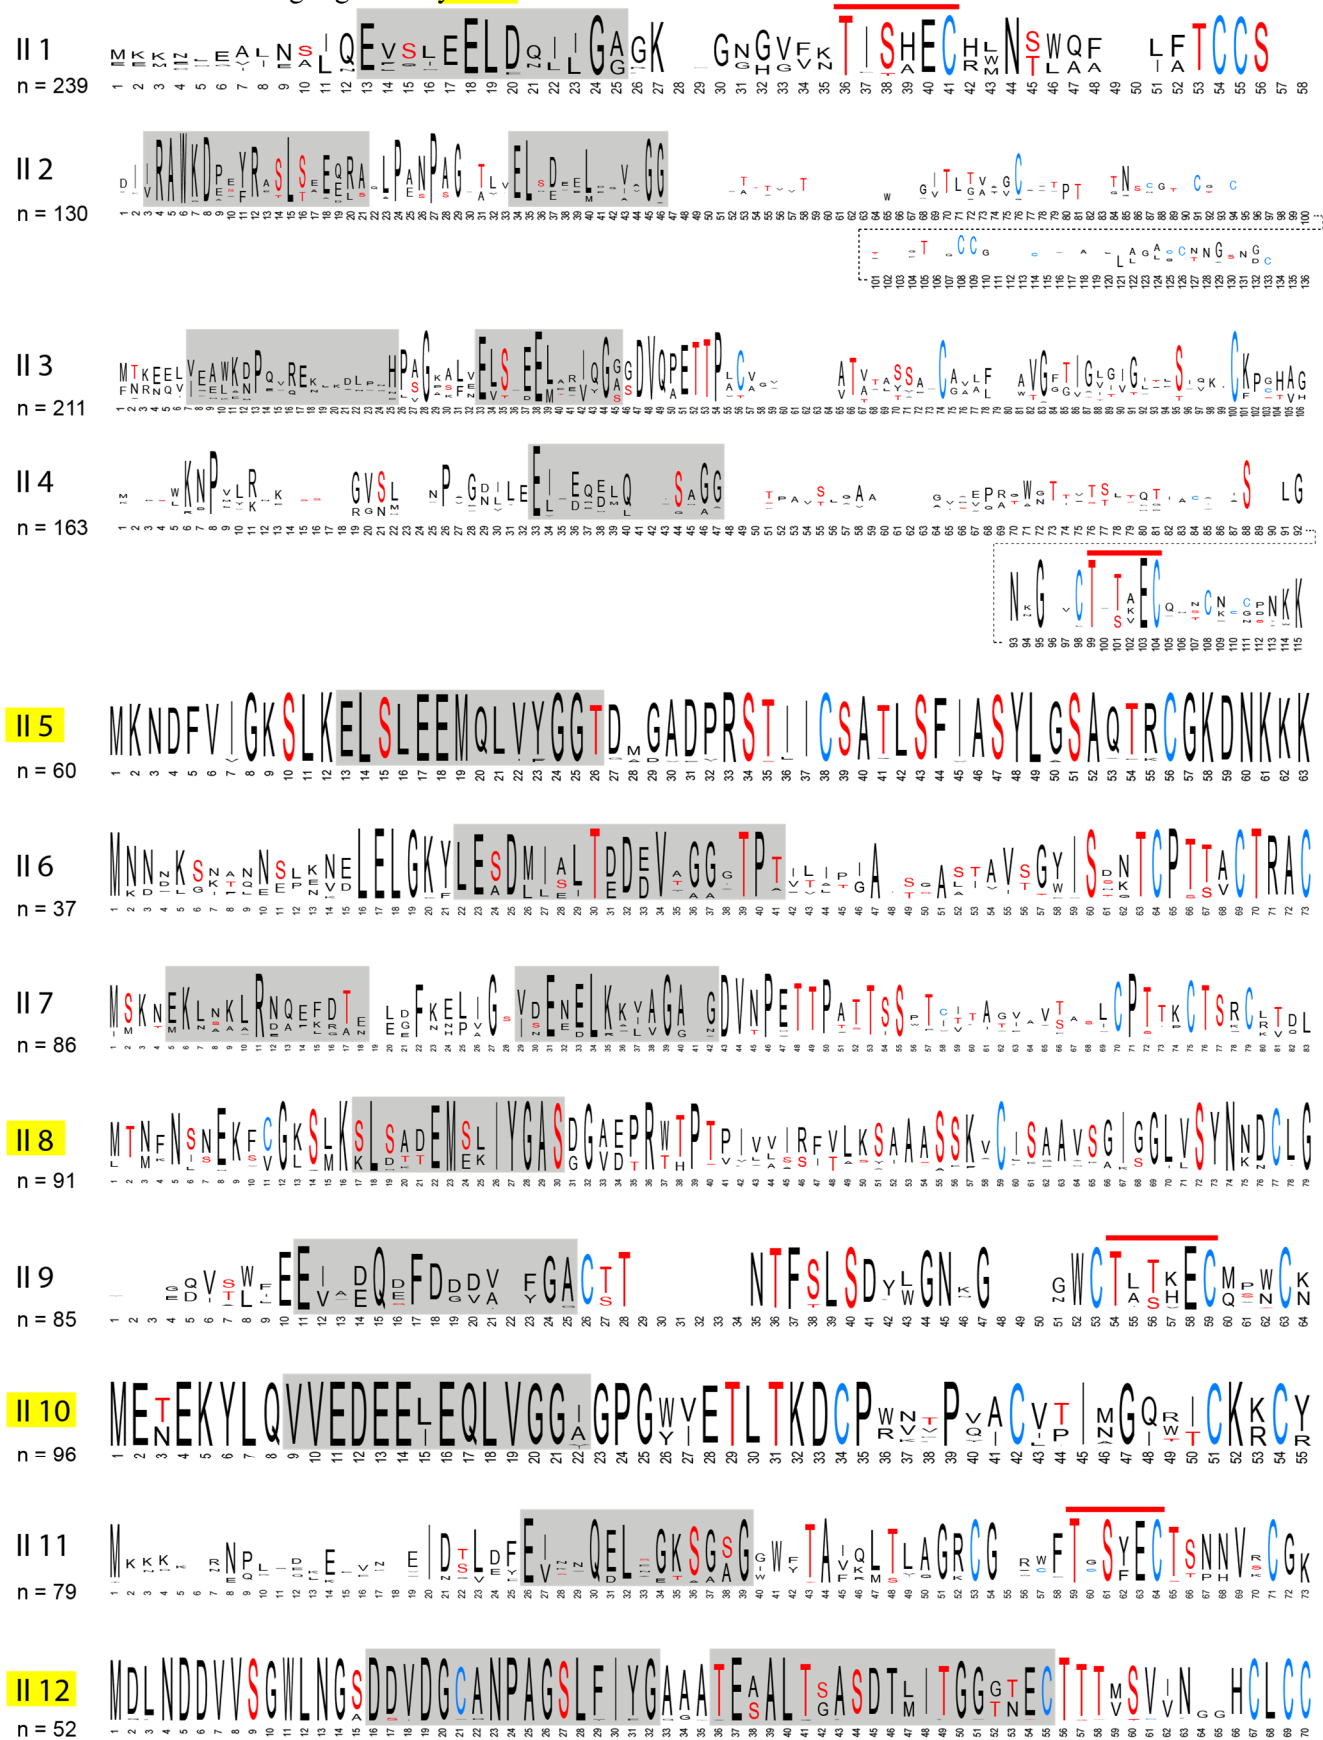

**II 13**  
 n = 33  
 1 MAE 2 3 4 5 6 7 8 9 10 11 12 13 14 15 16 17 18 19 20 21 22 23 24 25 26 27 28 29 30 31 32 33  
 S D Y L G E P K K F A R L I A A S D E F R A R Y E E P R A V I A E Y G V P G L P T P L P A R D E G E F D L E L E A G A A G T G T v S S T C T T  
 101 102 103 104 105 106 107 108 109 110 111 112 113 114 115 116 117 118 119 120 121 122 123

**II 14**  
 n = 65  
 1 M S F M K N S K D I L T N A I E E V S E K E L M E V A G G K K G S G W F A T I T D D C P N S V F V C C  
 2 3 4 5 6 7 8 9 10 11 12 13 14 15 16 17 18 19 20 21 22 23 24 25 26 27 28 29 30 31 32 33 34 35 36 37 38 39 40 41 42 43 44 45 46 47 48 49 50 51

**II 16**  
 n = 36  
 1 M E F M Z K K V V G C F E D M S I A E N T V Q G S G D V E T P T T P A C A I A A A A S S V K T A K G A A I S A I A V S G A V I S A V K C  
 2 3 4 5 6 7 8 9 10 11 12 13 14 15 16 17 18 19 20 21 22 23 24 25 26 27 28 29 30 31 32 33 34 35 36

**II 17**  
 n = 27  
 1 T R E L E A L V K A W D E F K Q E L L S N P A K A V A A E L G E P D E V V L E E T A Z K V Y L V L P P A A G A I E L S E E L E A V A G G  
 2 3 4 5 6 7 8 9 10 11 12 13 14 15 16 17 18 19 20 21 22 23 24 25 26 27  
 101 102 103 104 105 106 107 108 109 110 111 112 113 114 115 116 117 118 119 120 121 122 123

**II 18**  
 n = 34  
 1 M E K M Y F A G D L E E L E E I S L E I S G G G A E Q R G I S Q G N D G K L C T L T W E C G L C P T H T C W C  
 2 3 4 5 6 7 8 9 10 11 12 13 14 15 16 17 18 19 20 21 22 23 24 25 26 27 28 29 30 31 32 33 34

**II 19**  
 n = 27  
 1 M S D Y L G G Y D E A E L V E L S E A D V Y G G T T P W S C A T V T L V A T L V A S A A C P T T K C T S C  
 2 3 4 5 6 7 8 9 10 11 12 13 14 15 16 17 18 19 20 21 22 23 24 25 26 27

**II 21**  
 n = 48  
 1 M K K F A L E M T E E L K E L A G G S E F A T P M T V T P T T I T I P I S L A G C P T T K C A S I V S P C N D  
 2 3 4 5 6 7 8 9 10 11 12 13 14 15 16 17 18 19 20 21 22 23 24 25 26 27 28 29 30 31 32 33 34 35 36 37 38 39 40 41 42 43 44 45 46 47 48

**II 23**  
 n = 34  
 1 M S E K L N M S G D F Y L E F R A Y Q A P A N N G L L A T T M E C N T F G T C T N L E C S T L G C  
 2 3 4 5 6 7 8 9 10 11 12 13 14 15 16 17 18 19 20 21 22 23 24 25 26 27 28 29 30 31 32 33 34

**II 24**  
 n = 26  
 1 M E N L N A T N P V G S V L S E L I D T E M P T V A G G A Q A L G F T D G N C L T I T A D C T P W L G C  
 2 3 4 5 6 7 8 9 10 11 12 13 14 15 16 17 18 19 20 21 22 23 24 25 26

**II 25**  
 n = 32  
 1 M D D P P I L T E D E L R S A V R Q V F K R A Q T D W E F R Q L C L S D P A A A I R Q V S G K S L P S G F A L Q F T D T R E S V G  
 2 3 4 5 6 7 8 9 10 11 12 13 14 15 16 17 18 19 20 21 22 23 24 25 26 27 28 29 30 31 32

**II 26**  
 n = 39  
 1 M L N K E L L Q N A L Q Q Q Y K E A N L A E A I K L I T A G A Q K G V F T G E Y A Q L M S L E E L S E D L L V A G G  
 2 3 4 5 6 7 8 9 10 11 12 13 14 15 16 17 18 19 20 21 22 23 24 25 26 27 28 29 30 31 32 33 34 35 36 37 38 39  
 101 102 103 104 105 106 107 108 109 110 111 112 113 114 115 116 117 118 119 120 121 122 123

**II 27**  
 n = 30  
 1 M A V G L L M K A G N V S E E L A V L N N E H S L N A S L D T I C G T M G S L G C G S F G C G S L S S C C  
 2 3 4 5 6 7 8 9 10 11 12 13 14 15 16 17 18 19 20 21 22 23 24 25 26 27 28 29 30

II 28 MQAV<sup>1</sup>EEK<sup>2</sup>VQ<sup>3</sup>SG<sup>4</sup>TDRNADEVFDLV<sup>10</sup>GDLEQE<sup>15</sup>PPPLASPTNSGSGTACGTCAGvYCC<sup>55</sup>  
n = 34

II 29 VDI<sup>1</sup>VRS<sup>2</sup>WKD<sup>3</sup>ADYR<sup>4</sup>LS<sup>5</sup>LGSE<sup>6</sup>EAP<sup>7</sup>HP<sup>8</sup>SGE<sup>9</sup>GL<sup>10</sup>LTA<sup>11</sup>EL<sup>12</sup>DEEL<sup>13</sup>TE<sup>14</sup>INGAAG<sup>15</sup>SG<sup>16</sup>v<sup>17</sup>LG<sup>18</sup>LGCC<sup>19</sup>s<sup>20</sup>CLPW<sup>21</sup>YS<sup>22</sup>G<sup>23</sup> P<sup>24</sup> WT<sup>25</sup> VCG<sup>26</sup>LA<sup>27</sup>C<sup>28</sup>NP<sup>29</sup>GK<sup>30</sup>PC<sup>31</sup>KN<sup>32</sup>  
n = 31

II 30 MNNKFTGKINELELEQLVGDNQVVGGIPTIPATISFVGVTFVTVLNAGAPTSGCTKSCNK  
n = 34

II 31 VDI<sup>1</sup>VRS<sup>2</sup>WKD<sup>3</sup>ADYR<sup>4</sup>LS<sup>5</sup>LGSE<sup>6</sup>EAP<sup>7</sup>HP<sup>8</sup>SGE<sup>9</sup>GL<sup>10</sup>LTA<sup>11</sup>EL<sup>12</sup>DEEL<sup>13</sup>TE<sup>14</sup>INGAAG<sup>15</sup>SG<sup>16</sup>v<sup>17</sup>LG<sup>18</sup>LGCC<sup>19</sup>s<sup>20</sup>CLPW<sup>21</sup>YS<sup>22</sup>G<sup>23</sup> P<sup>24</sup> WT<sup>25</sup> VCG<sup>26</sup>LA<sup>27</sup>C<sup>28</sup>NP<sup>29</sup>GK<sup>30</sup>PC<sup>31</sup>KN<sup>32</sup>  
n = 31

II 32 MAQKDFPQKINSQLEEISDN<sup>15</sup>SAVGAG<sup>20</sup>WAQLS<sup>25</sup>FISEALGNKGAVCTGTIECQNNCR  
n = 33

II 33 M<sup>1</sup> I<sup>2</sup> D<sup>3</sup> N<sup>4</sup> M<sup>5</sup> N<sup>6</sup> K<sup>7</sup> Z<sup>8</sup> F<sup>9</sup> H<sup>10</sup> N<sup>11</sup> I<sup>12</sup> G<sup>13</sup> S<sup>14</sup> F<sup>15</sup> E<sup>16</sup> L<sup>17</sup> Q<sup>18</sup> E<sup>19</sup> M<sup>20</sup> D<sup>21</sup> F<sup>22</sup> S<sup>23</sup> G<sup>24</sup> A<sup>25</sup> E<sup>26</sup> G<sup>27</sup> T<sup>28</sup> V<sup>29</sup> E<sup>30</sup> P<sup>31</sup> Q<sup>32</sup> A<sup>33</sup> T<sup>34</sup> P<sup>35</sup> T<sup>36</sup> I<sup>37</sup> A<sup>38</sup> S<sup>39</sup> P<sup>40</sup> S<sup>41</sup> T<sup>42</sup> P<sup>43</sup> C<sup>44</sup> A<sup>45</sup> R<sup>46</sup> V<sup>47</sup> A<sup>48</sup> S<sup>49</sup> I<sup>50</sup> V<sup>51</sup> S<sup>52</sup> G<sup>53</sup> A<sup>54</sup> V<sup>55</sup> S<sup>56</sup> A<sup>57</sup> V<sup>58</sup> V<sup>59</sup> S<sup>60</sup> G<sup>61</sup> L<sup>62</sup> A<sup>63</sup> S<sup>64</sup> A<sup>65</sup> T<sup>66</sup> K<sup>67</sup> D<sup>68</sup> L<sup>69</sup> D<sup>70</sup>  
n = 26

II 36 MPPVASPDIDISSAEEINRWLSDTSLDGS DSPAGPLFTGGRYVVQEITATWGGCNSWTVYCSCTGSPICCC  
n = 28

II 46 MENL<sup>2</sup>S<sup>3</sup>VVP<sup>4</sup>SFEEL<sup>5</sup>SVEEMEA<sup>10</sup>IQGS<sup>15</sup>GDVQAE<sup>20</sup>TTPVCAVAATAAASSAACG<sup>35</sup>WVGGG<sup>40</sup>IFTGVTVVVSLKHC<sup>68</sup>  
n = 23

**Supplementary Figure S6.** Sequence logos generated from alignments of class III precursor peptides in clusters with 20 or more members (in Figure 2) using WebLogo [10]. Conserved leader motifs that are shared among multiple clusters (from Figure S2) are boxed in gray. Families with no characterized members are highlighted in yellow.

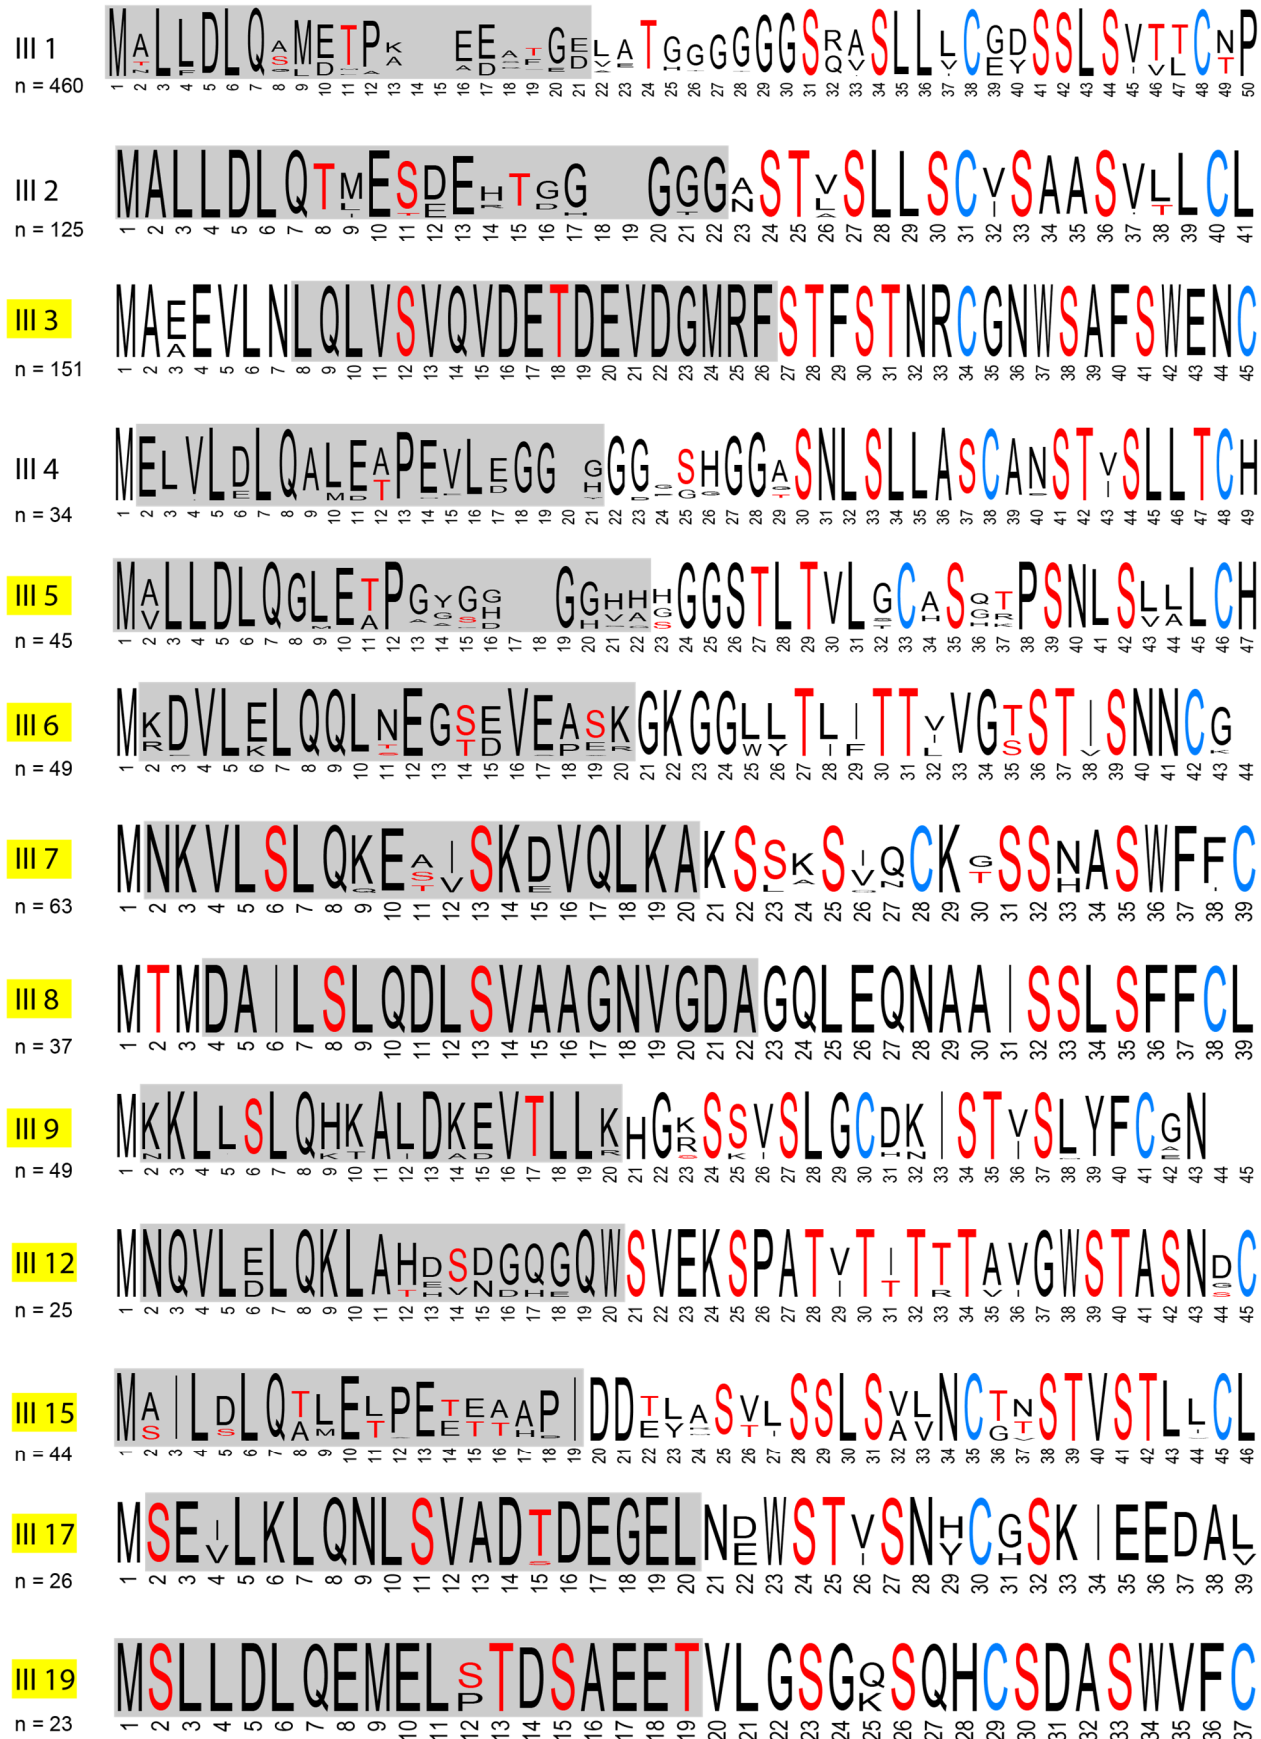

**Supplementary Figure S7.** Sequence logos generated from alignments of class IV precursor peptides in clusters with 20 or more members (in Figure 2) using WebLogo [10]. Conserved leader motifs that are shared among multiple clusters (from Figure S2) are boxed in gray. Families with no previously characterized members are highlighted in yellow.

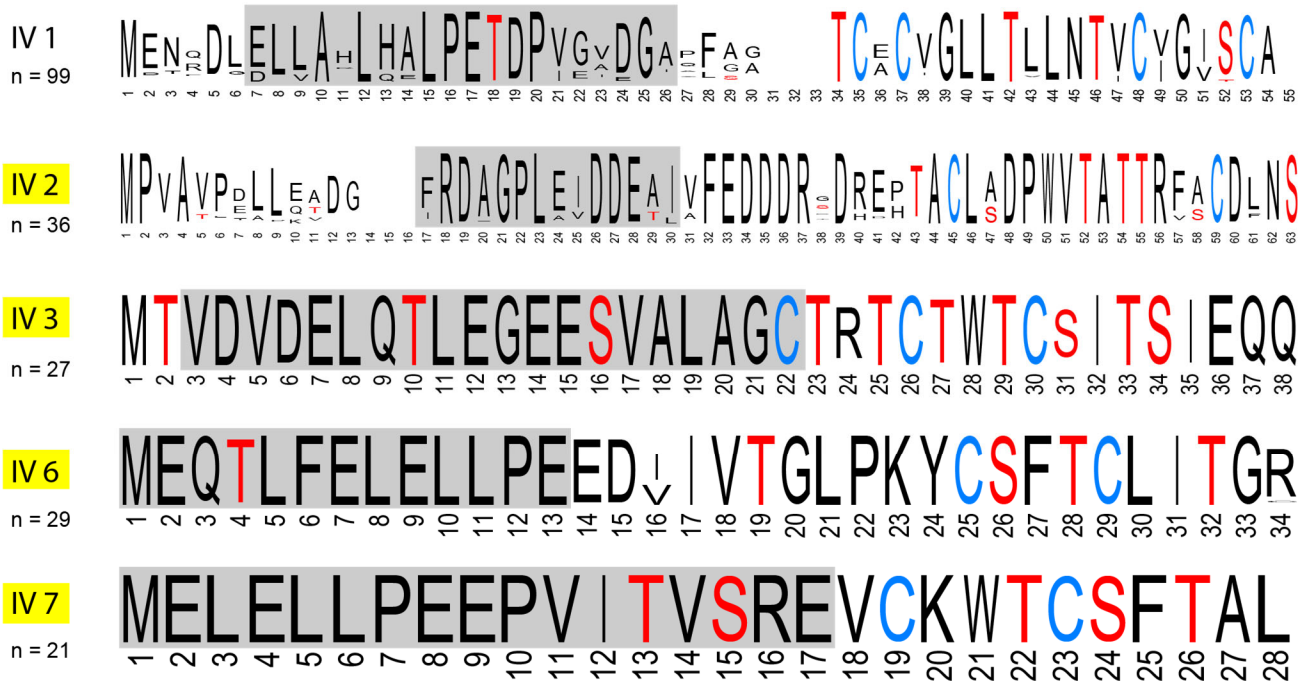

**Supplementary Table S6.** Twenty most abundant proteins in class I BGCs that belong to at least one Pfam family. If a protein has multiple domains from different Pfam families, those families are separated by a slash. Potential secondary modification enzymes are highlighted in **yellow**. Split LanBs, with the glutamylation and elimination domains on separate polypeptides, are denoted sLanB.

| Pfam families                                                     | Description                                                                                        | Count            |
|-------------------------------------------------------------------|----------------------------------------------------------------------------------------------------|------------------|
| LANC_like (PF05147)                                               | LanC                                                                                               | 2,204            |
| Lant_dehydr_N (PF04738)/Lant_dehydr_C (PF14028)                   | LanB                                                                                               | 1,745            |
| ABC_tran (PF00005)                                                | LanT                                                                                               | 657              |
| Lant_dehydr_C (PF14028)                                           | LanB elimination domain                                                                            | 562 (193 sLanBs) |
| <b>PCMT (PF01135)</b>                                             | <b>Protein-L-isoaspartate(D-aspartate) O-methyltransferase</b>                                     | <b>571</b>       |
| Gallidermin (PF02052)                                             | Gallidermin- and nisin-like precursor peptides                                                     | 426              |
| ABC2_membrane_4 (PF12730)                                         | LanT                                                                                               | 363              |
| HTH_31 (PF13560)                                                  | transcriptional regulator                                                                          | 307              |
| Lant_dehydr_N (PF04738)                                           | PEARL                                                                                              | 304 (193 sLanBs) |
| ABC_membrane (PF00664)/ABC_tran (PF00005)                         | LanT                                                                                               | 283              |
| Lant_dehydr_C (PF14028)/PCMT (PF01135)                            | LanB elimination domain and Protein-L-isoaspartate(D-aspartate) O-methyltransferase fusion protein | 261              |
| Peptidase_C39 (PF03412)/ABC_membrane (PF12730)/ABC_tran (PF00005) | LanT <sub>p</sub>                                                                                  | 258              |
| HATPase_c_2 (PF13581)                                             | Histidine kinase-like ATPase                                                                       | 197              |
| Response_reg (PF00072)/Trans_reg_C (PF00486)                      | transcriptional regulator                                                                          | 180              |
| Peptidase_S8 (PF00082)                                            | LanP <sub>A</sub>                                                                                  | 172              |
| <b>Flavoprotein (PF02441)</b>                                     | <b>LanD</b>                                                                                        | <b>146</b>       |
| <b>Acetyltransf_1 (PF00583)</b>                                   | <b>N-acetyltransferase</b>                                                                         | <b>142</b>       |
| <b>DUF397 (PF04149)</b>                                           | <b>Domain of Unknown Function</b>                                                                  | <b>140</b>       |
| MFS_1 (PF07690)                                                   | Major Facilitator Superfamily protein                                                              | 128              |
| Leukocidin (PF07968)                                              | Leukocidin/Hemolysin toxin family protein                                                          | 127              |

**Supplementary Table S7.** Twenty most abundant proteins in class II BGCs that belong to at least one Pfam family. If a protein has multiple domains from different Pfam families, those families are separated by a slash. Potential tailoring enzymes are highlighted in **yellow**.

| Pfam families                                                     | Description                                                    | Count      |
|-------------------------------------------------------------------|----------------------------------------------------------------|------------|
| DUF4135 (PF13575)/LANC_like (PF05147)                             | LanM                                                           | 2,163      |
| Peptidase_C39 (PF03412)/ABC_membrane (PF12730)/ABC_tran (PF00005) | LanT <sub>p</sub>                                              | 1,270      |
| ABC_tran (PF00005)                                                | LanT                                                           | 886        |
| ABC2_membrane_4 (PF12730)                                         | LanT                                                           | 761        |
| Mersacidin (PF16934)                                              | Mersacidin-like precursor peptide                              | 705        |
| L_biotic_typeA (PF04604)                                          | Type A lanthipeptide precursor peptide                         | 532        |
| HTH_3 (PF01381)                                                   | transcriptional regulator                                      | 348        |
| Lantibiotic_a (PF14867)                                           | Alpha precursor peptide                                        | 339        |
| Response_reg (PF00072)/GerE (PF00196)                             | transcriptional regulator                                      | 308        |
| Peptidase_S8 (PF00082)                                            | LanP <sub>A</sub>                                              | 291        |
| ABC_membrane (PF00664)/ABC_tran (PF00005)                         | LanT                                                           | 222        |
| ABC_tran (PF00005)/DUF4162 (PF13732)                              | LanT                                                           | 213        |
| <b>FMN_red (PF03358)</b>                                          | <b>Flavin mononucleotide reductase</b>                         | <b>186</b> |
| HisKA (PF00512)/HATPase_c (PF02518)                               | 2-component response regulator                                 | 180        |
| Response_reg (PF00072)/Trans_reg_C (PF00486)                      | transcriptional regulator                                      | 164        |
| GerE (PF00196)                                                    | transcriptional regulator                                      | 140        |
| Nhase_alpha (PF02979)                                             | precursor peptide with nitrile hydratase family leader peptide | 119        |
| Nif11 (PF07862)                                                   | precursor peptide with Nif11 family leader peptide             | 109        |
| FtsX (PF02687)                                                    | FtsX-like permease family                                      | 104        |
| LANC_like (PF05147)                                               | LanC (split LanM possibly from sequencing errors)              | 95         |

**Supplementary Table S8.** Twenty most abundant proteins in class III BGCs that belong to at least one Pfam family. If a protein has multiple domains from different Pfam families, those families are separated by a back slash. Potential tailoring enzymes are highlighted in yellow. LanP<sub>P</sub> is a Pro oligopeptidase that is distinct from the LanP<sub>A</sub> subtilin-like S8 peptidases.

| Pfam families                                                                           | Description                                                          | Count |
|-----------------------------------------------------------------------------------------|----------------------------------------------------------------------|-------|
| ABC_membrane (PF00664)/ABC_tran (PF00005)                                               | LanT                                                                 | 1,514 |
| Pkinase (PF00069)/LANC_like (PF05147)                                                   | LanKC                                                                | 1,511 |
| ABC_tran (PF00005)                                                                      | LanT                                                                 | 781   |
| Response_reg (PF00072)/GerE (PF00196)                                                   | transcriptional regulator                                            | 715   |
| GerE (PF00196)                                                                          | transcriptional regulator                                            | 263   |
| MFS_1 (PF07690)                                                                         | Major facilitator superfamily protein                                | 243   |
| adh_short (PF00106)                                                                     | short chain dehydrogenase                                            | 156   |
| GAF_2 (PF13185)/PAS_3 (PF08447)/GAF_2 (PF13185)/SpoIIIE (PF07228)/HATPase_c_2 (PF13581) | Unknown                                                              | 135   |
| trypsin (PF00089)                                                                       | Protease                                                             | 133   |
| Pkinase (PF00069)                                                                       | protein kinase                                                       | 133   |
| HTH_20 (PF12840)                                                                        | transcriptional regulator                                            | 123   |
| Acetyltransf_1 (PF00583)                                                                | N-acetyltransferase                                                  | 122   |
| BPD_transp_1 (PF00528)                                                                  | Binding-protein-dependent transport system, inner membrane component | 121   |
| FtsX (PF02687)/FtsX (PF02687)                                                           | FtsX-like permease                                                   | 119   |
| GAF_2 (PF13185)/PAS_4 (PF08448)/GAF_2 (PF13185)/SpoIIIE (PF07228)                       | Unknown                                                              | 114   |
| Acetyltransf_3 (PF13302)                                                                | N-acetyltransferase                                                  | 113   |
| Peptidase_S9 (PF00326)                                                                  | LanP <sub>P</sub>                                                    | 112   |
| FecCD (PF01032)                                                                         | FecCD transport family                                               | 102   |
| Mac (PF12464) /Hexapep (PF00132)                                                        | Acetyltransferase                                                    | 97    |
| DUF4265 (PF14085)                                                                       | Domain of unknown function                                           | 93    |

**Supplementary Table S9.** Twenty most abundant proteins in class IV BGCs that belong to at least one Pfam family. If a protein has multiple domains from different Pfam families, those families are separated by a back slash. Known class IV BGCs comprise only 4 genes, so these entries may include proteins encoded by genes that are not part of the gene cluster. Potential tailoring enzymes are highlighted in yellow.

| Pfam families                                              | Description                                                          | Count |
|------------------------------------------------------------|----------------------------------------------------------------------|-------|
| Pkinase (PF00069)/LANC_like (PF05147)                      | LanL                                                                 | 340   |
| ABC_membrane (PF00664)/ABC_tran (PF00005)                  | LanT                                                                 | 164   |
| Peptidase_S9 (PF00326)                                     | LanP <sub>P</sub>                                                    | 112   |
| MFS_1 (PF07690)                                            | Major facilitator Superfamily protein                                | 101   |
| ABC2_membrane (PF01061)                                    | LanT                                                                 | 83    |
| ABC_tran (PF00005)/DUF4162 (PF13732)                       | LanT                                                                 | 82    |
| HATPase_c_2 (PF13581)                                      | Histidine kinase-like ATPase domain                                  | 48    |
| ABC_tran (PF00005)                                         | LanT                                                                 | 48    |
| Nif3 (PF01784)                                             | NGG1p interacting factor 3                                           | 46    |
| NAD_binding_10 (PF13460)                                   | NAD(P)H-binding protein                                              | 35    |
| STAS_2 (PF13466)                                           | STAS domain containing protein                                       | 31    |
| DAO (PF01266)                                              | FAD dependent oxidoreductase                                         | 30    |
| BPD_transp_1 (PF00528)                                     | Binding-protein-dependent transport system, inner membrane component | 30    |
| TrmK (PF04816)                                             | N-methyltransferase                                                  | 29    |
| Glycos_transf_2 (PF00535)                                  | Glycosyl transferase                                                 | 28    |
| SBP_bac_3 (PF00497)                                        | Bacterial extracellular solute-binding protein                       | 26    |
| Methyltransf_19 (PF04672)                                  | Methyltransferase                                                    | 26    |
| GDP_Man_Dehyd (PF16363)                                    | GDP-mannose 4,6-dehydratase                                          | 26    |
| SNF2_assoc (PF08455)/SNF2_N (PF00176)/Helicase_C (PF00271) | Helicase                                                             | 24    |
| Response_reg (PF00072)/Sigma70_r4_2 (PF08281)              | Response regulator                                                   | 25    |



**Supplementary Table S10.** Distribution among the lanthipeptide classes of Pfams that are in the 20 most abundant protein families in a single class. Values are presented on the basis of domains, so Pfam families that occur in multidomain proteins and single domain proteins are counted together. The Pfam are listed in order of decreasing frequency.

| Pfam protein family       | Top 20 most abundant in class | Class I | Class II | Class III | Class IV |
|---------------------------|-------------------------------|---------|----------|-----------|----------|
| PCMT (PF01135)            | I                             | 835     | 1        | 1         | 0        |
| Flavoprotein (PF02441)    | I                             | 146     | 26       | 24        | 4        |
| Acetyltransf_1 (PF00583)  | I, III                        | 149     | 47       | 142       | 12       |
| FMN_red (PF03358)         | II                            | 34      | 186      | 7         | 4        |
| adh_short (PF00106)       | III                           | 57      | 30       | 157       | 19       |
| Acetyltransf_3 (PF13302)  | III                           | 57      | 12       | 113       | 9        |
| Mac (PF12464)             | III                           | 0       | 0        | 97        | 0        |
| TrmK (PF04816)            | IV                            | 0       | 0        | 0         | 29       |
| DAO (PF01266)             | IV                            | 6       | 1        | 9         | 30       |
| NAD_binding_10 (PF13460)  | IV                            | 21      | 10       | 19        | 38       |
| GDP_Man_Dehyd (PF16363)   | IV                            | 2       | 0        | 65        | 26       |
| Glycos_transf_2 (PF00535) | IV                            | 36      | 8        | 39        | 29       |
| Methyltransf_19 (PF04672) | IV                            | 64      | 12       | 9         | 26       |

**Supplementary Figure S8.** Example putative biosynthetic gene clusters encoding the enzymes in Table S10. LanA genes that were not annotated in the genome are indicated in red. Because BGC boundaries are not known, the genes encoding the noted enzymes may or may not be part of the lanthipeptide BGC for all panels of Supplementary Figure S8.

## O-methyltransferase containing clusters

### Class I

*Streptomyces clavuligerus* ATCC 27064

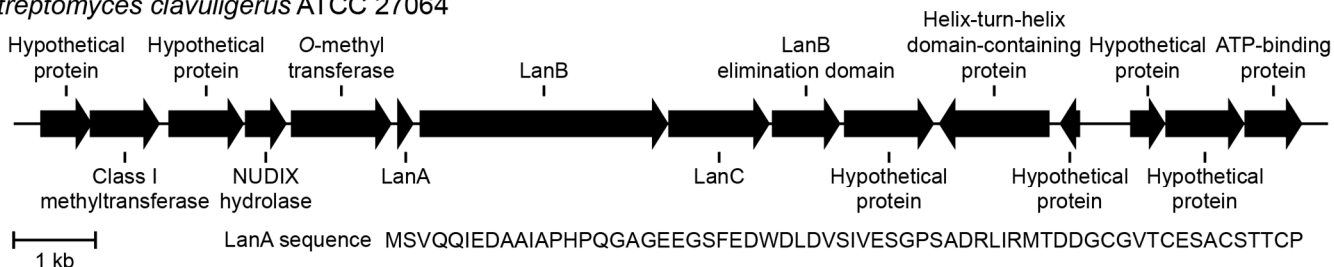

### Class II

*Marinicella sediminis* strain F2

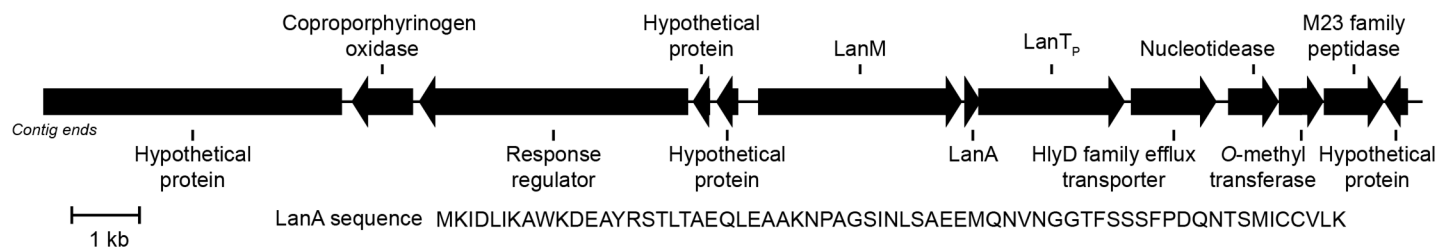

### Class III

*Streptomyces varsoviensis* strain NRRL ISP-5346

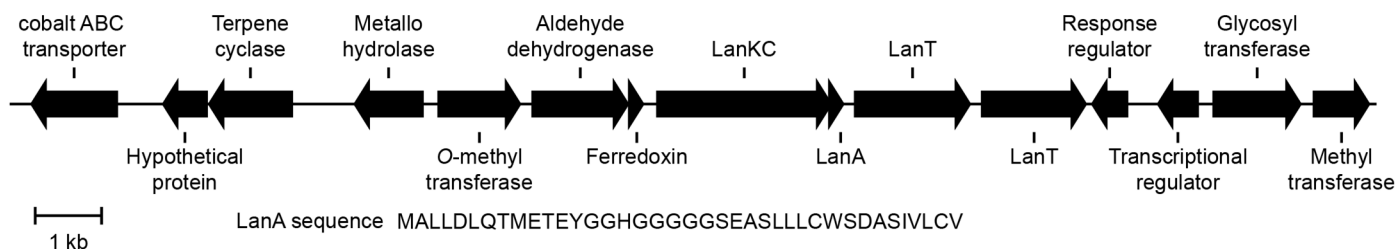

Supplementary Figure S8 continued.

Flavoprotein containing clusters

Class I

*Brevibacillus* sp. BC25

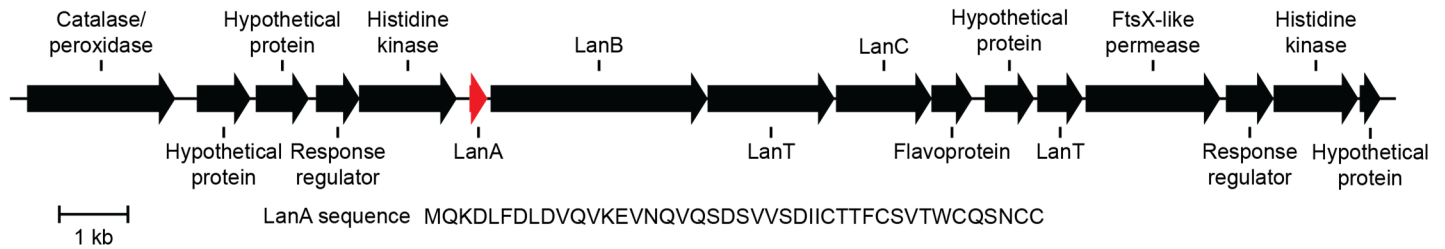

Class II

*Bacillus velezensis* strain GH1-13

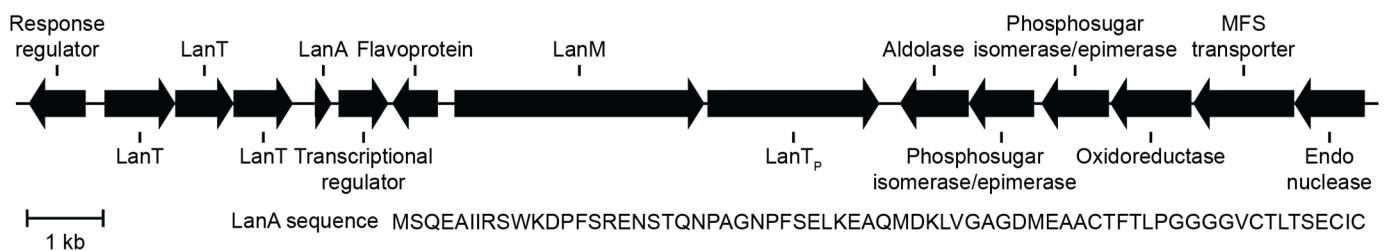

Class III

*Streptomyces bicolor* strain NRRL B-5348

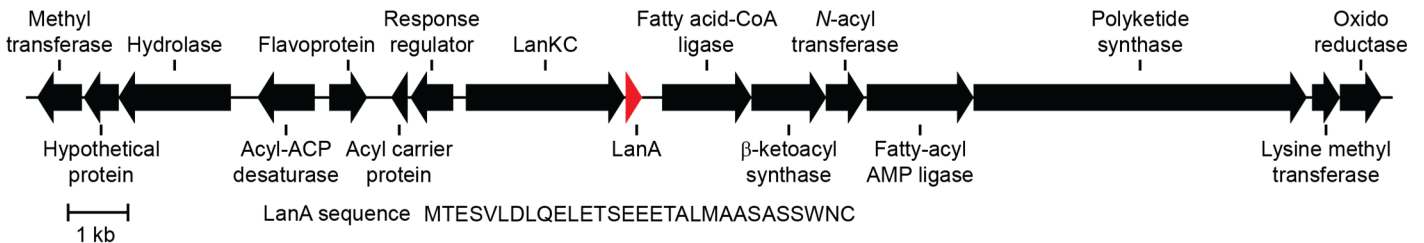

Class IV

*Streptomyces* sp. Ach 505

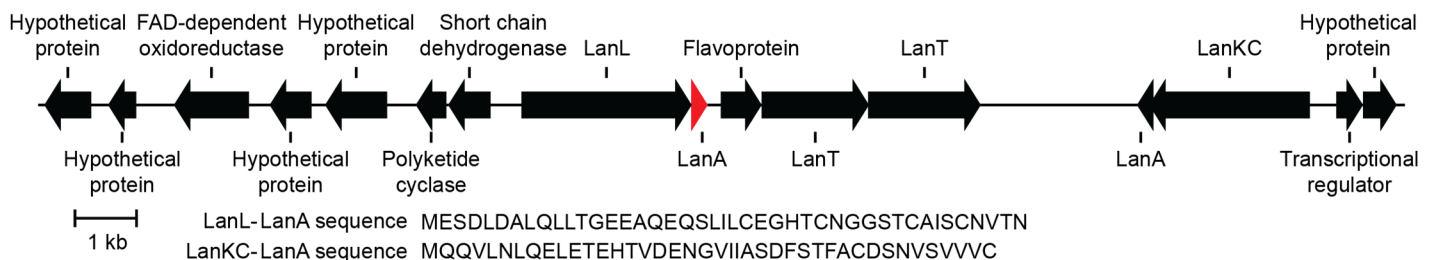

Supplementary Figure S8 continued.

**Acyltransferase (Acyltransf\_1) containing clusters**

**Class I**

*Paenibacillus polymyxa* strain NCTC10343

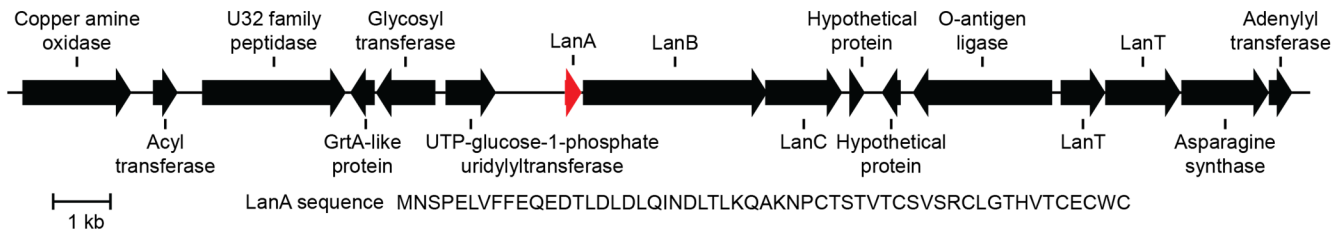

**Class II**

*Thermoanaerobaculum aquaticum* strain MP-01

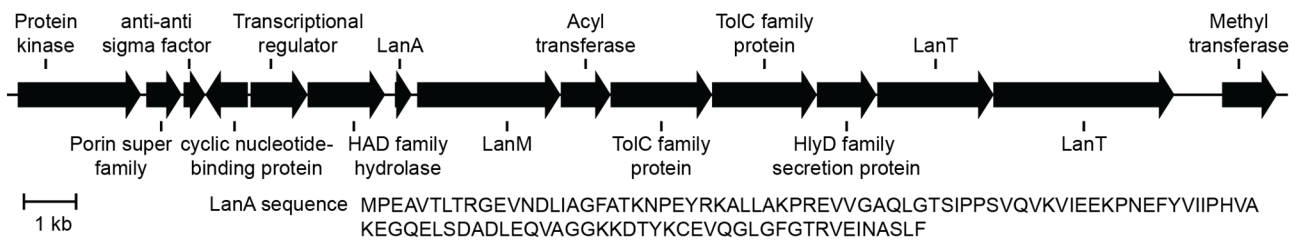

**Class III**

*Streptomyces* sp. CNS654

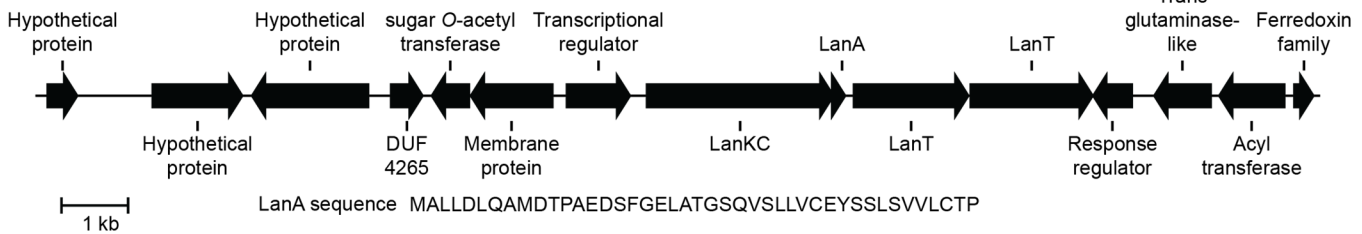

**Class IV**

*Streptomyces baarnensis* strain NRRL B-2842

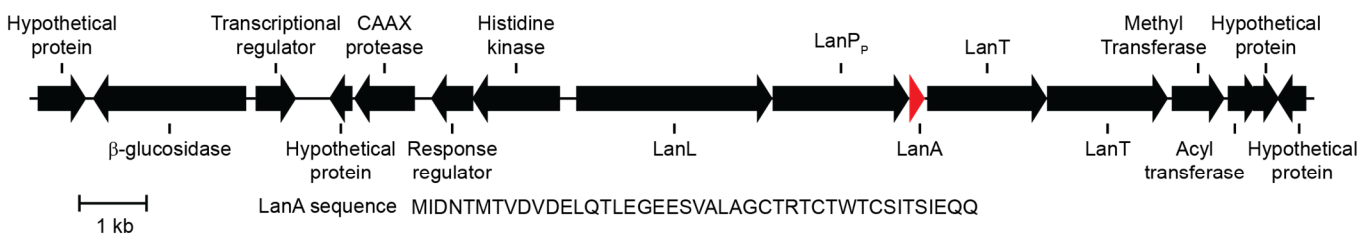

Supplementary Figure S8 continued.

FMN reductase (FMN\_red) containing clusters

Class I

*Listeria monocytogenes* strain AL-OM-1-WH2

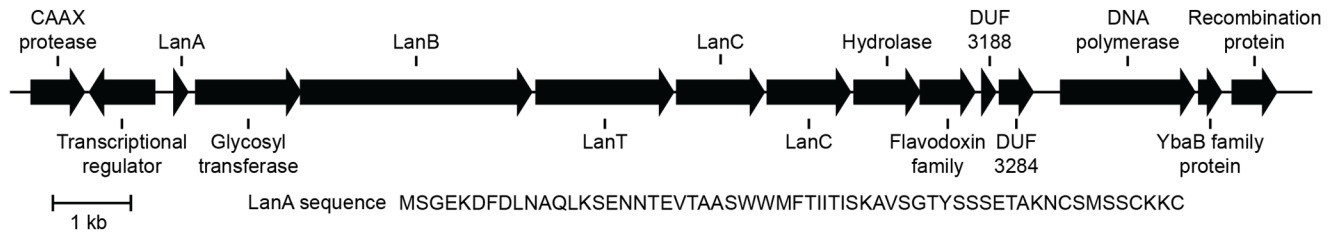

Class II

*Bacillus cereus* VD166

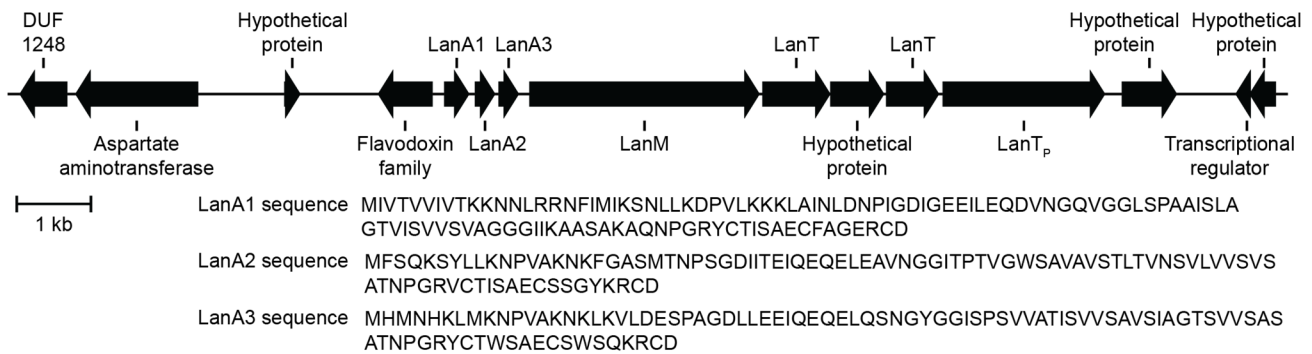

Class III

*Streptomyces* sp. CNS654

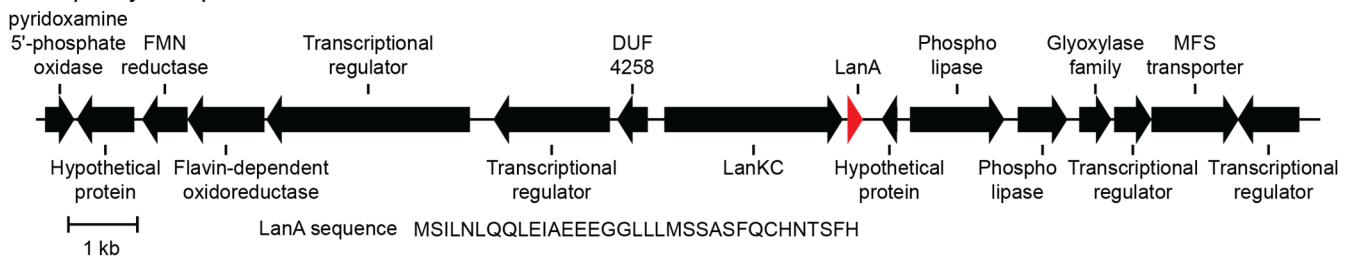

Class IV

*Streptomyces misionensis* strain DSM 40306

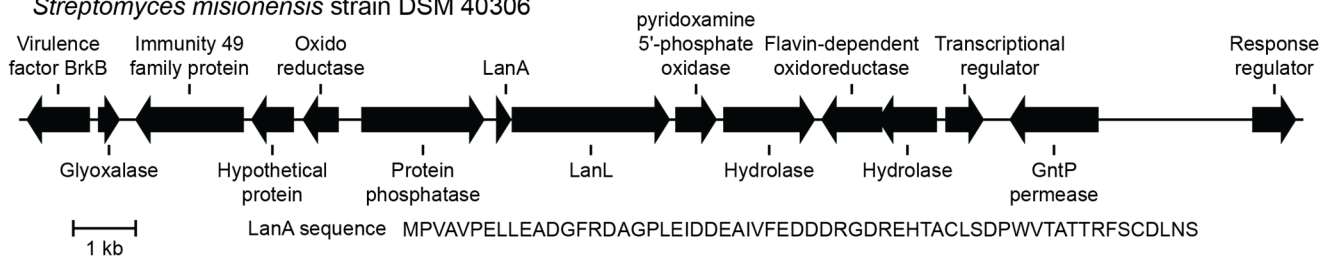

Supplementary Figure S8 continued.

Short chain dehydrogenase (adh\_short) containing clusters

Class I

*Frankia* sp. QA3

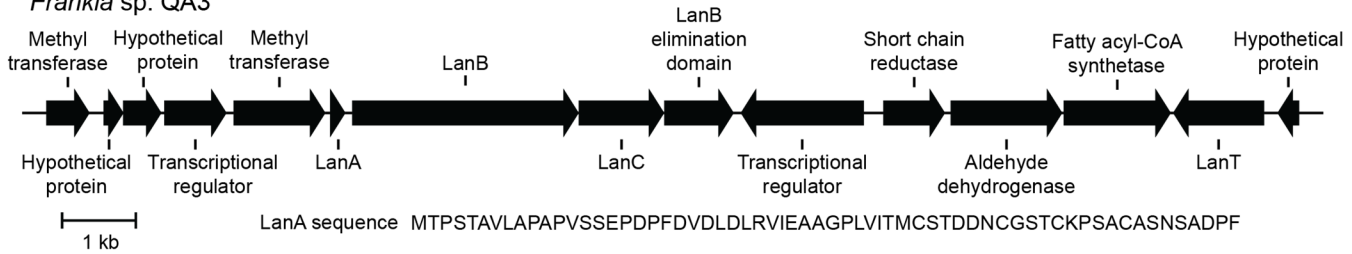

Class II

*Bacillus thuringiensis* MC28

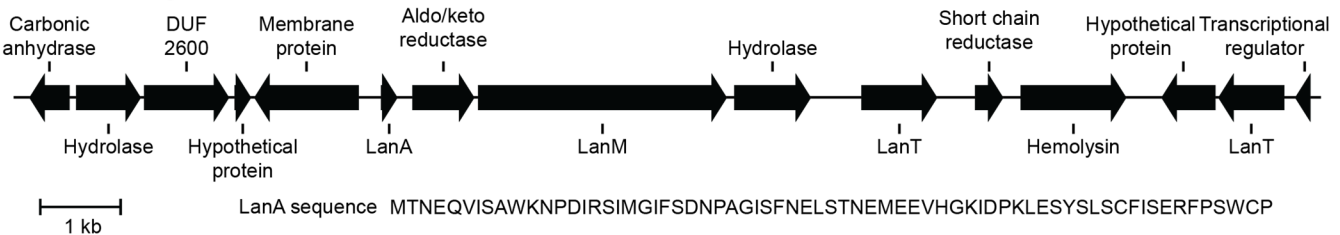

Class III

*Rhodococcus erythropolis* SK121

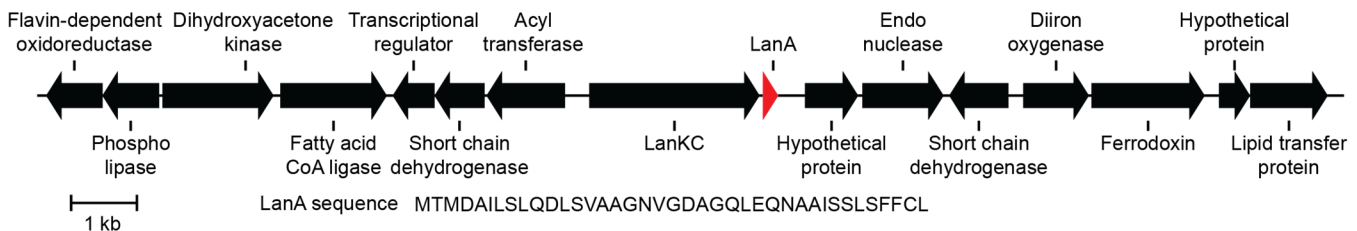

Class IV

*Streptomyces flavochromogenes* strain NRRL B-2684

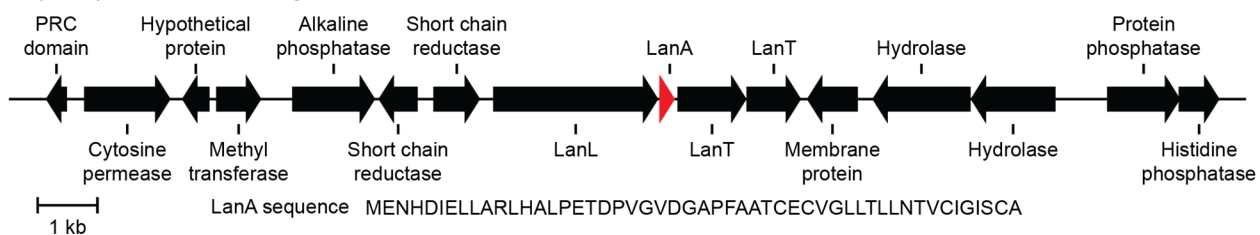

Supplementary Figure S8 continued.

Acyltransferase (Acetyltransf\_3) containing clusters

Class I

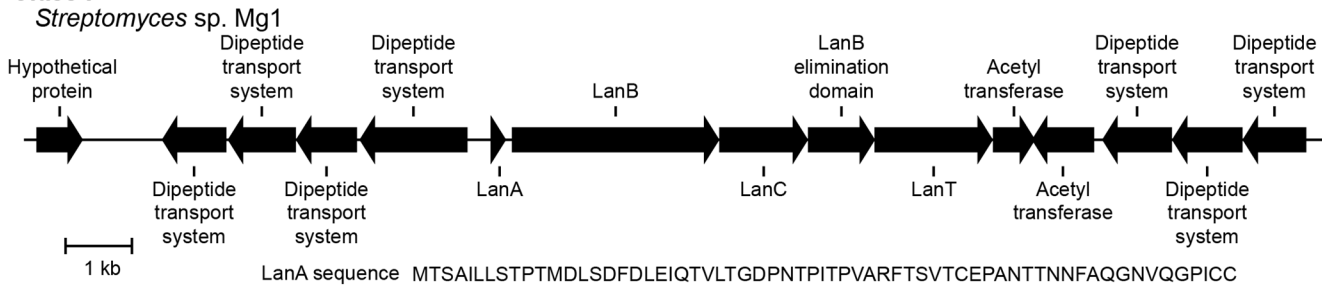

Class II

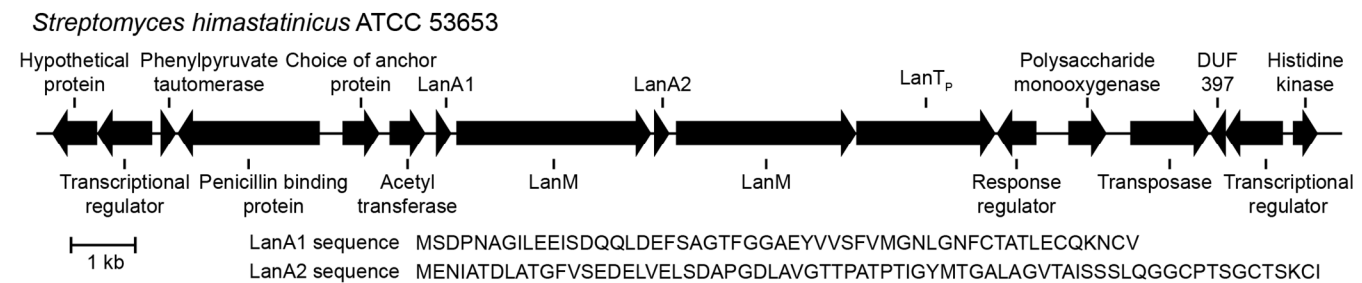

Class III

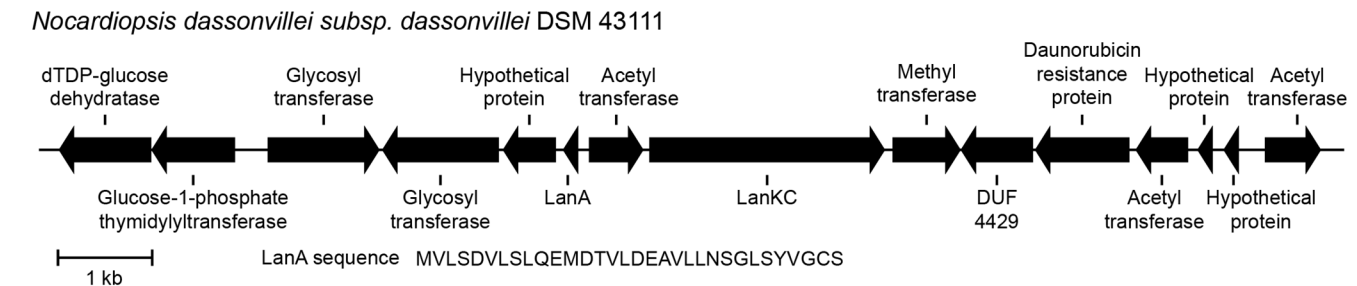

Class IV

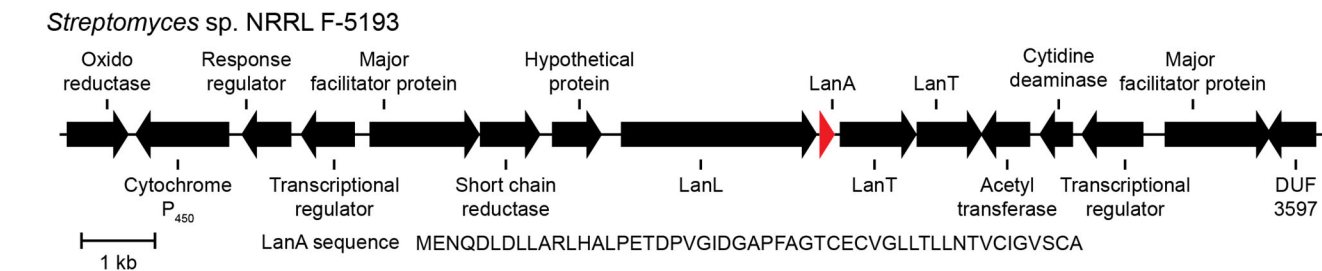

Supplementary Figure S8 continued.

**Glycosyltransferase (Glycos\_transf\_2) containing clusters**

**Class I**

*Pedobacter heparinus* DSM 2366

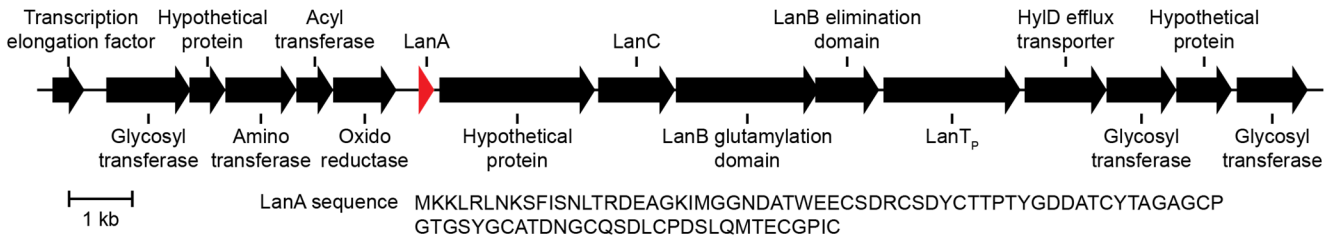

**Class II**

*Kitasatospora aureofaciens* strain NRRL B-1286

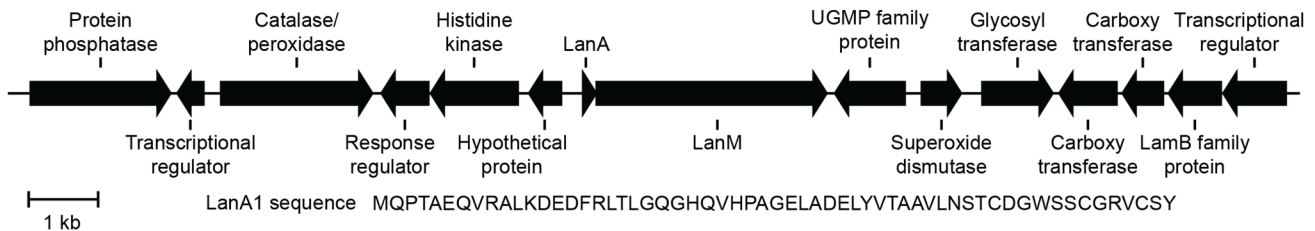

**Class III**

*Streptomyces pseudovenezuelae* strain DSM 40212

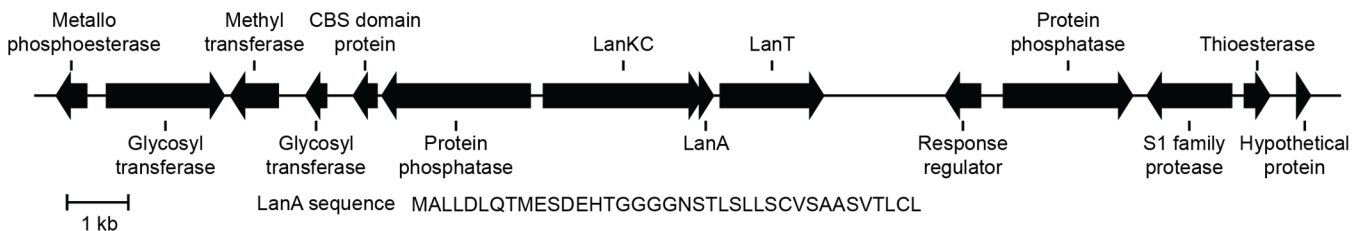

**Class IV**

*Streptomyces* sp. NRRL F-5193

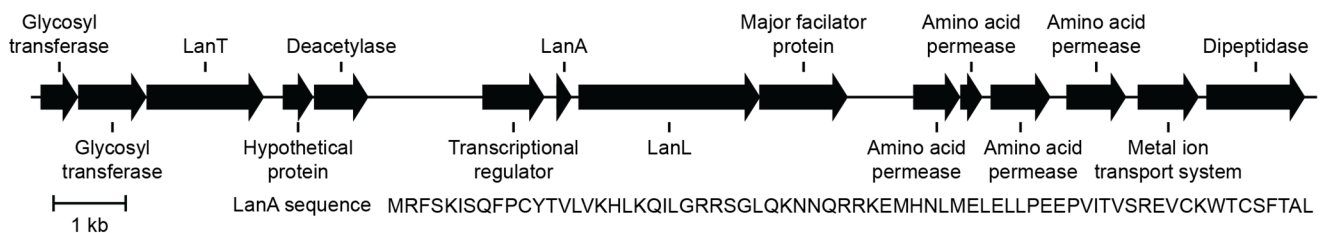



Supplementary Figure S8 continued.

**Methyltransferase (Methyltransf\_19) containing clusters**

**Class I**

*Streptomyces sulphureus* DSM 40104

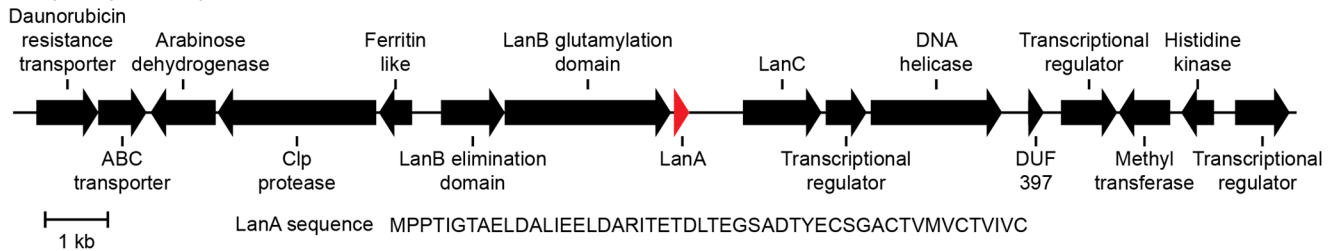

**Class II**

*Streptomyces* sp. WZ.A104

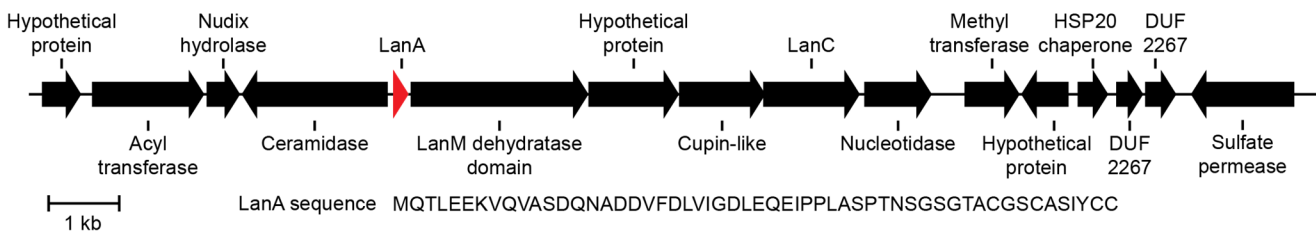

**Class III**

*Streptomyces canus* strain DSM 40017

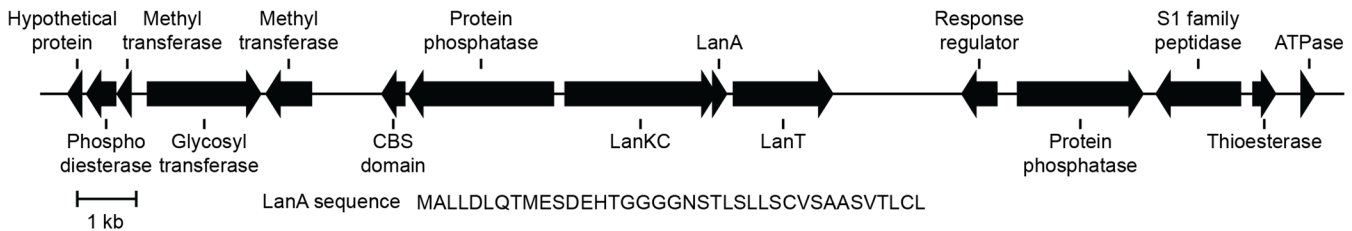

**Class IV**

*Streptomyces globisporus* C-1027

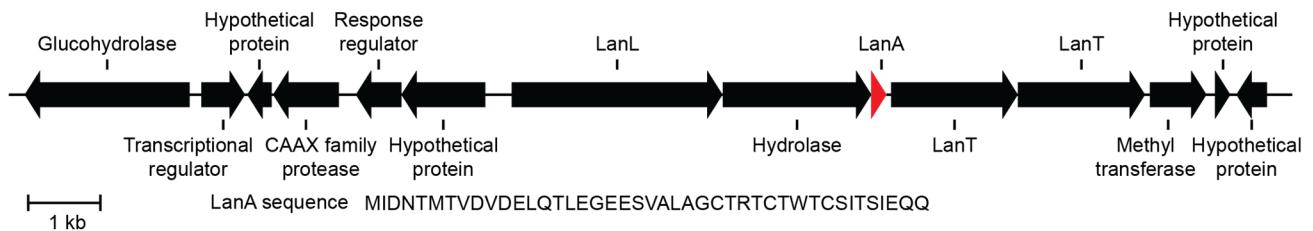

**Supplementary Table S11.** Distribution of select Pfam protein families from BGCs. The enzymes belonging to these families potentially carry-out secondary post-translational modifications. Values are presented on the basis of domains, so Pfam protein families that occur in multidomain proteins or single domain proteins are counted together. NRPS: non-ribosomal peptide synthetase, PKS: polyketide synthase, FAS: fatty acid synthase.

| <b>Pfam protein families</b>                   | <b>Class I</b> | <b>Class II</b> | <b>Class III</b> | <b>Class IV</b> |
|------------------------------------------------|----------------|-----------------|------------------|-----------------|
| YcaO (PF02624)                                 | 4              | 42              | 2                | 0               |
| Radical_SAM (PF04055)                          | 39             | 49              | 42               | 43              |
| p450 (PF00067)                                 | 45             | 44              | 50               | 23              |
| Condensation (PF00668) (NRPS)                  | 45             | 31              | 10               | 2               |
| Ketoacyl-synt_C (PF02801) (PKS/FAS)            | 34             | 5               | 92               | 8               |
| ADH_N (PF08240) (zinc-dependent dehydrogenase) | 56             | 63              | 38               | 27              |
| 2OG-Fell_Oxy_3 (PF13640)                       | 0              | 5               | 4                | 0               |

**Supplementary Figure S9.** Example biosynthetic gene clusters encoding the enzymes in Table S11. LanA genes that were not annotated in the genome are indicated in red. Because BGC boundaries are not known, the noted enzymes may or may not be part of the lanthipeptide BGC for all panels of Supplementary Figure S9.

## YcaO containing clusters

### Class I

*Actinokineospora enzanensis* DSM 44649

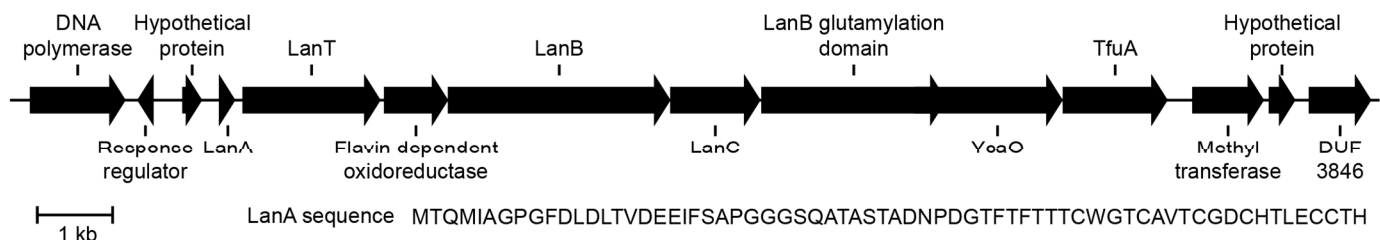

### Class II

*Chryseobacterium vrystaatense* strain LMG 22846

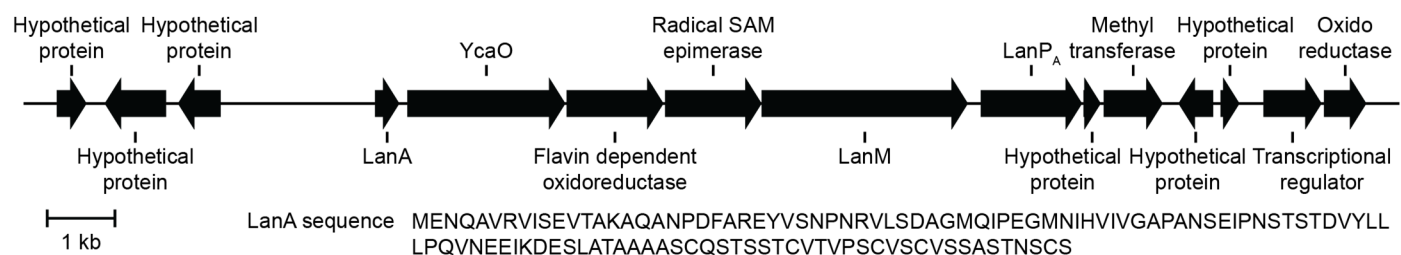

### Class III

*Nocardiopsis valliformis* DSM 45023

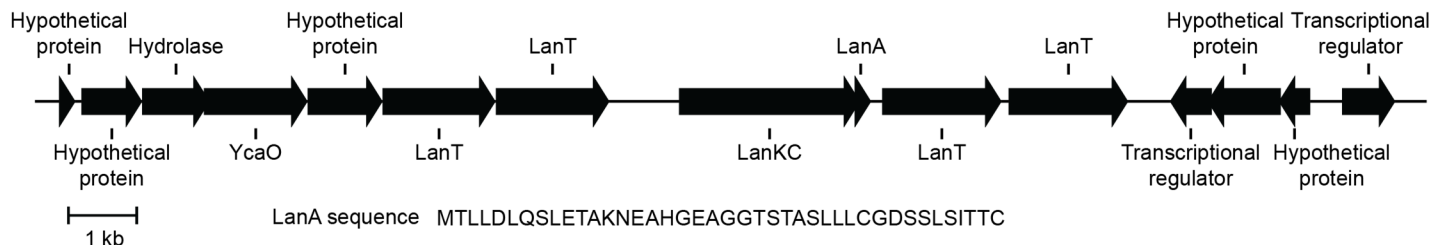

Supplementary Figure S9 continued.

Radical SAM containing clusters

Class I

*Tannerella forsythia* 92A2

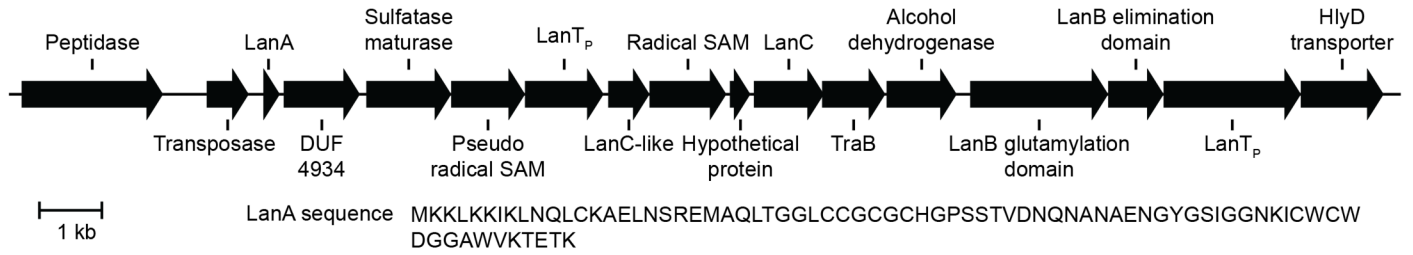

Class II

*Butyrivibrio proteoclasticus* strain P18

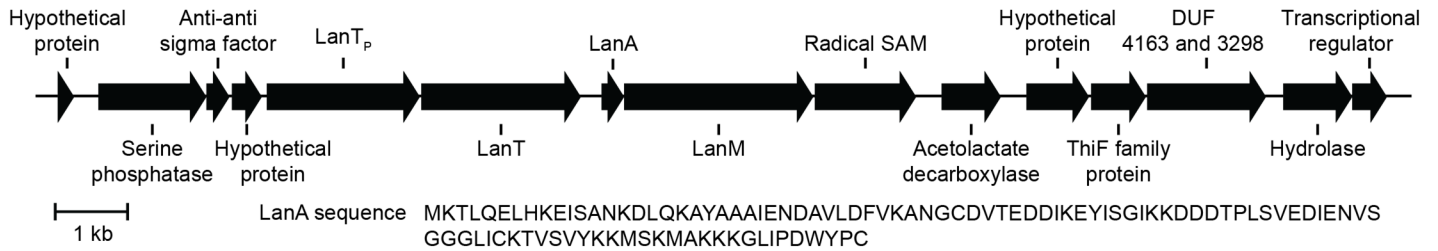

Class III

*Kibdelosporangium aridum* strain A82846

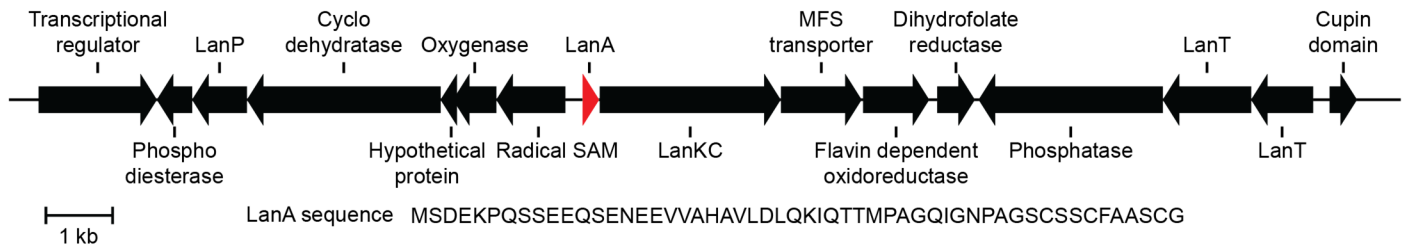

Class IV

*Kibdelosporangium aridum* strain A82846

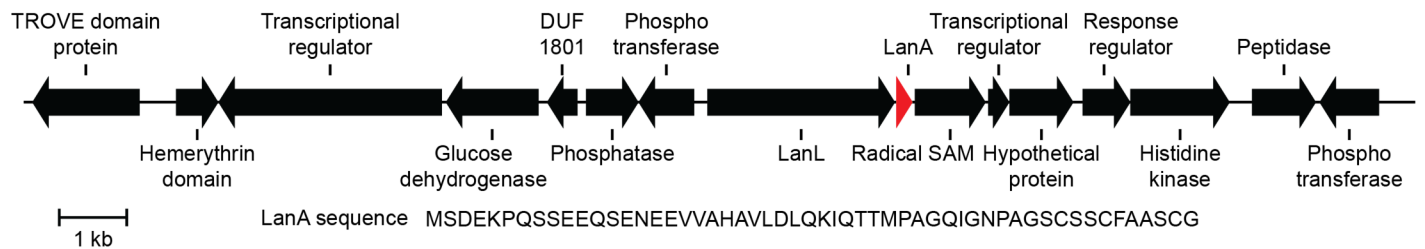

Supplementary Figure S9 continued.

**Cytochrome P<sub>450</sub> containing clusters**

**Class I**

*Actinomadura madurae* strain DSM 43067

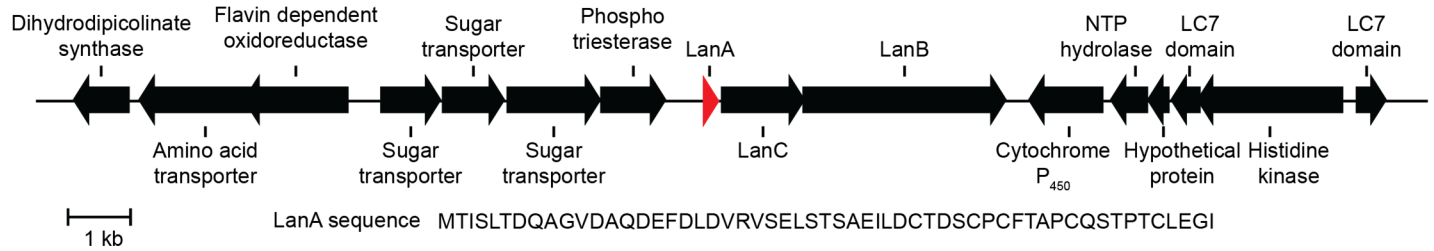

**Class II**

*Lentzea terrae* strain NEAU-LZS 42

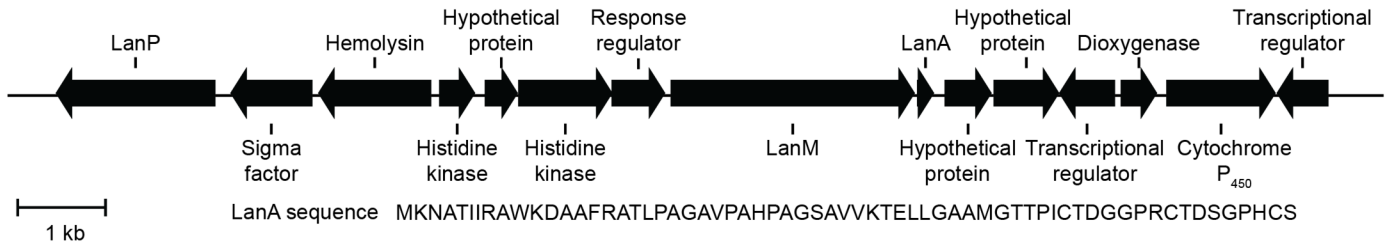

**Class III**

*Streptomyces* sp. NRRL F-4428

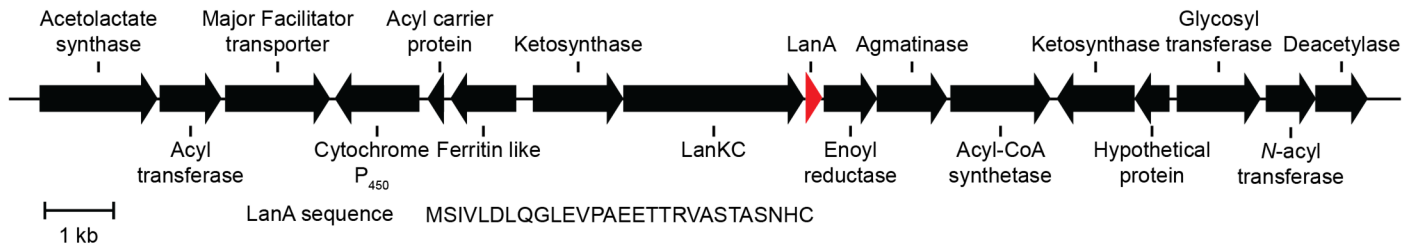

**Class IV**

*Streptomyces* sp. NRRL F-5193

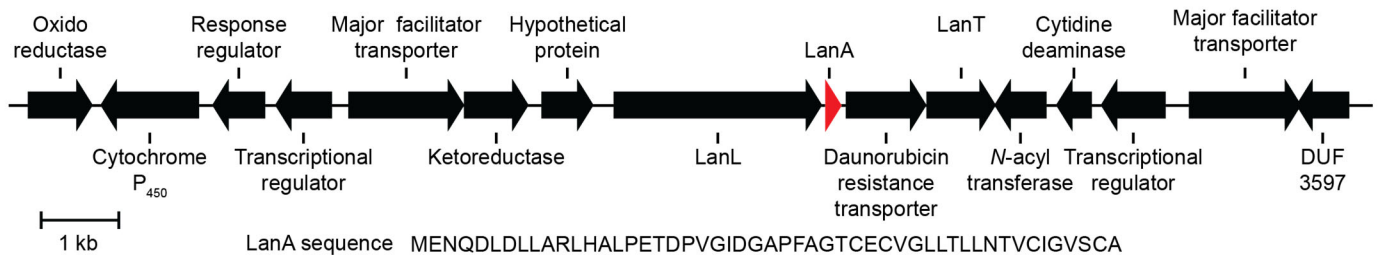

Supplementary Figure S9 continued.

**Nonribosomal peptide synthetase containing clusters**

**Class I**

*Tumebacillus avium* strain AR23208

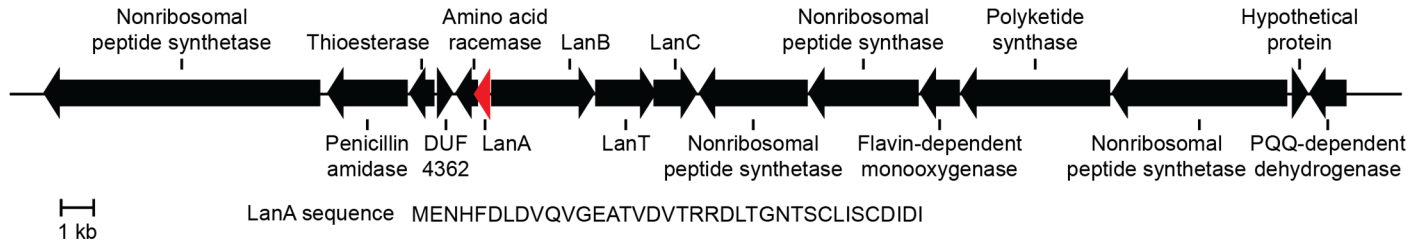

**Class II**

*Saccharothrix variispora* strain DSM 43911

6-pyruvoyl tetrahydropterin synthase

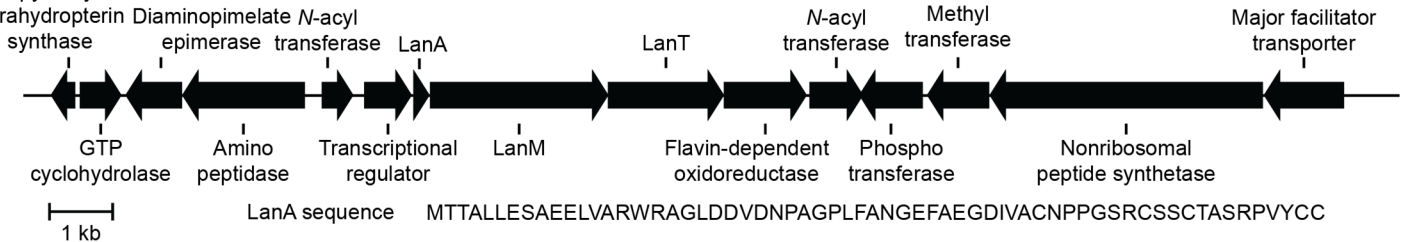

**Class III**

*Streptomyces* sp. NRRL F-4428

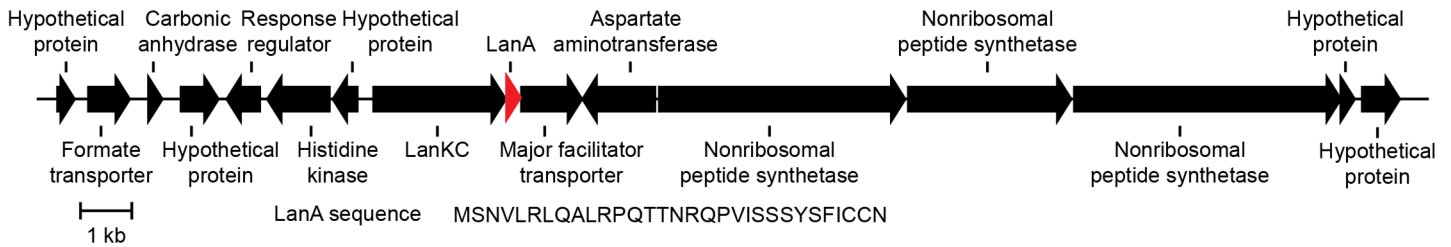

**Class IV**

*Streptomyces venezuelae*

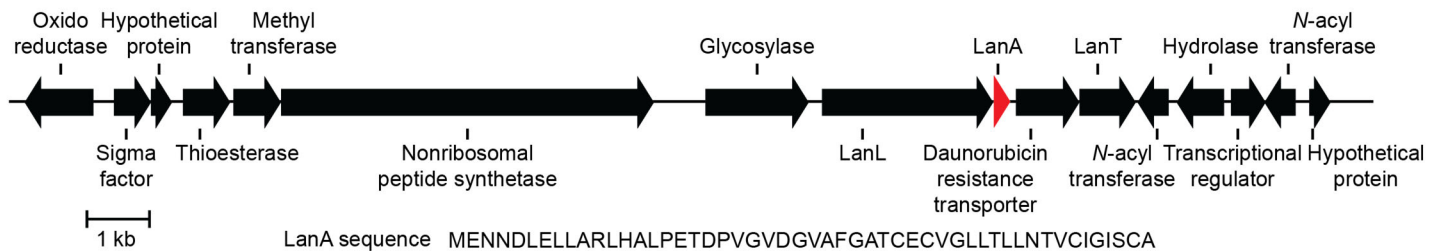

Supplementary Figure S9 continued.

**Polyketide synthase containing clusters**

**Class I**

*Streptomyces formicae* strain KY5

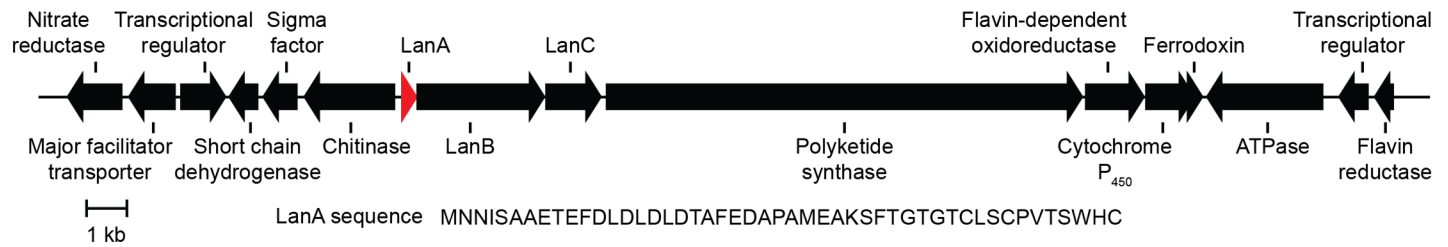

**Class II**

*Actinoplanes brasiliensis* strain DSM 43805

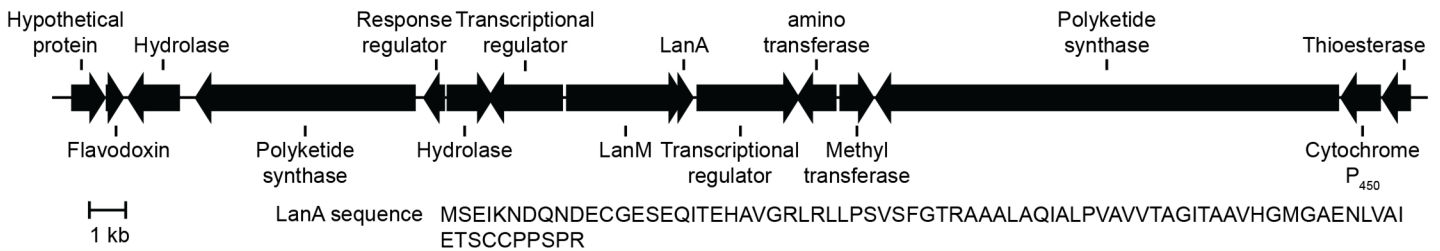

**Class III**

*Nocardia* sp. NRRL S-836

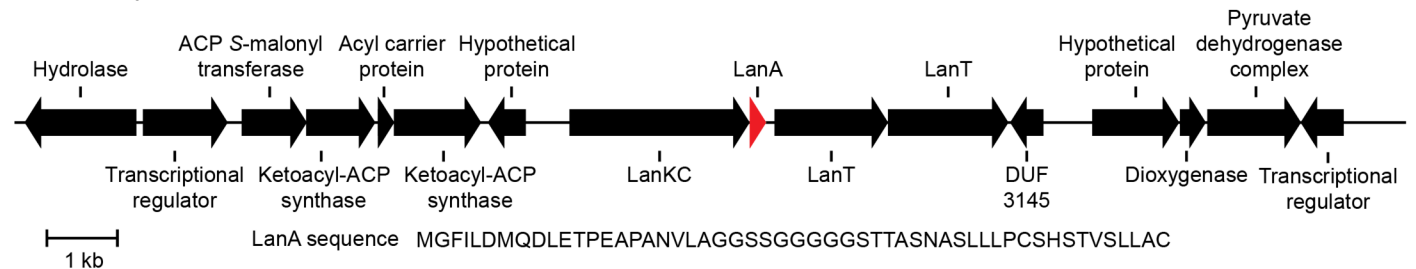

**Class IV**

*Amycolatopsis jejuensis* strain NRRL B-24427

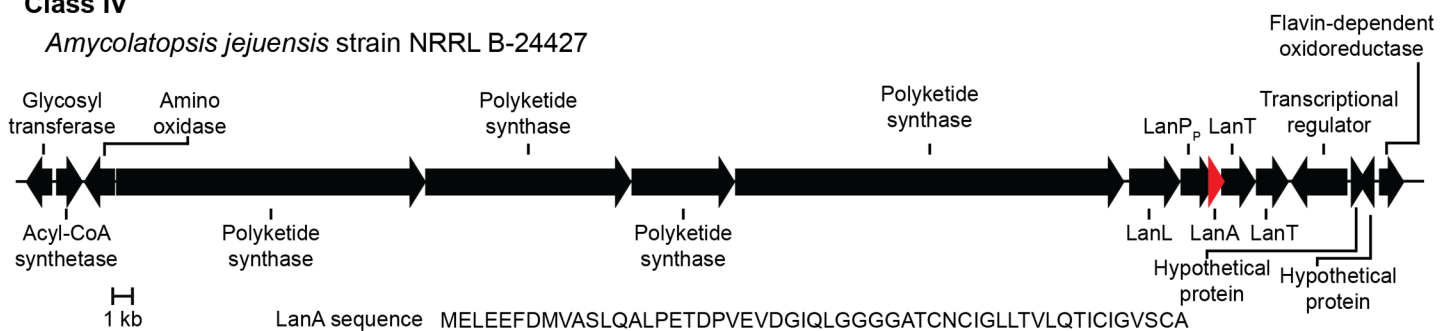

Supplementary Figure S9 continued.

Zinc-dependent alcohol dehydrogenase containing clusters

Class I

*Streptomyces* sp. CB02959

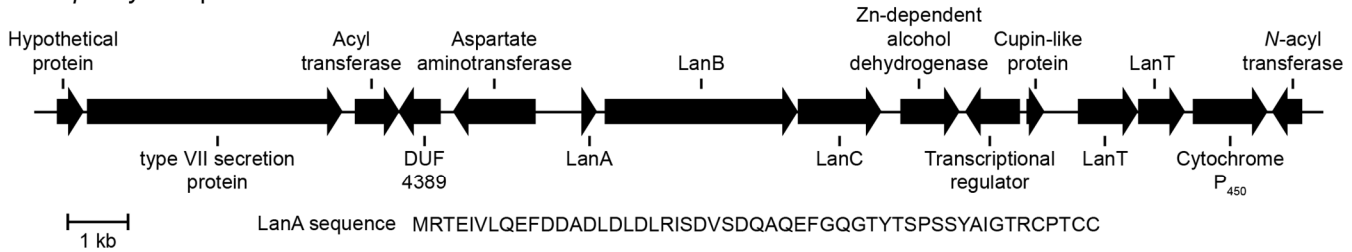

Class II

*Enterococcus faecalis* strain 4928STDY7071440

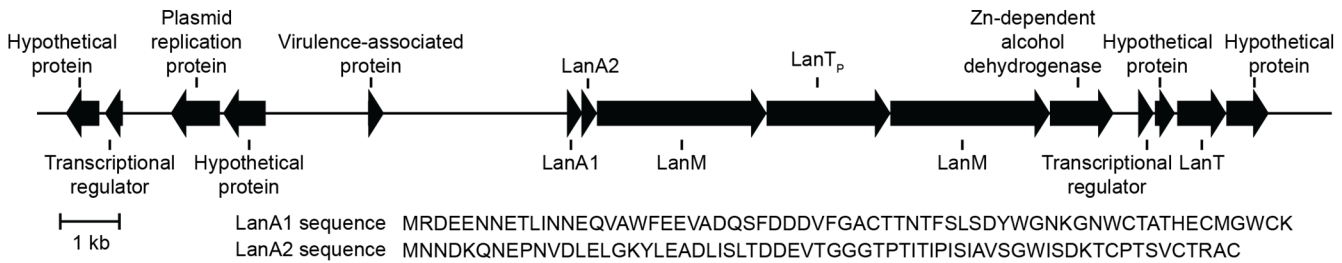

Class III

*Nonomuraea* sp. ATCC 55076

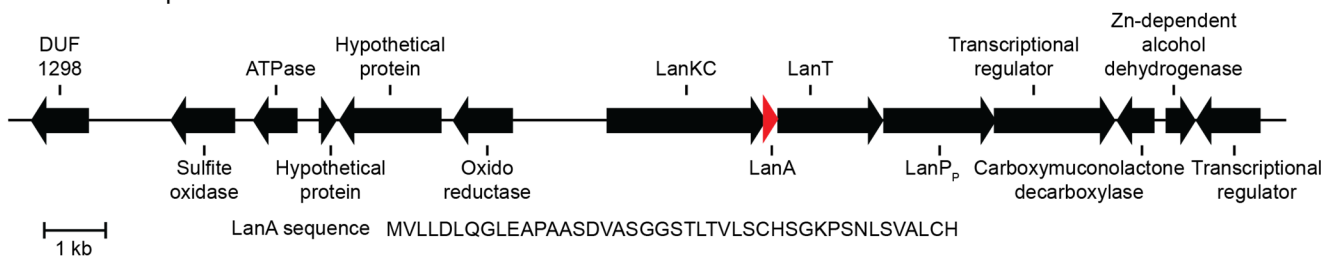

Class IV

*Kitatospora* sp. CB01950

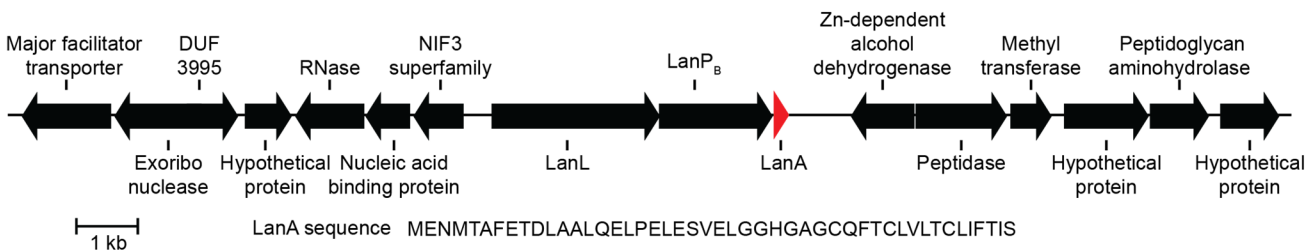



Supplementary Figure S10. Phylogenetic distribution of genomes in the dataset used for this study.

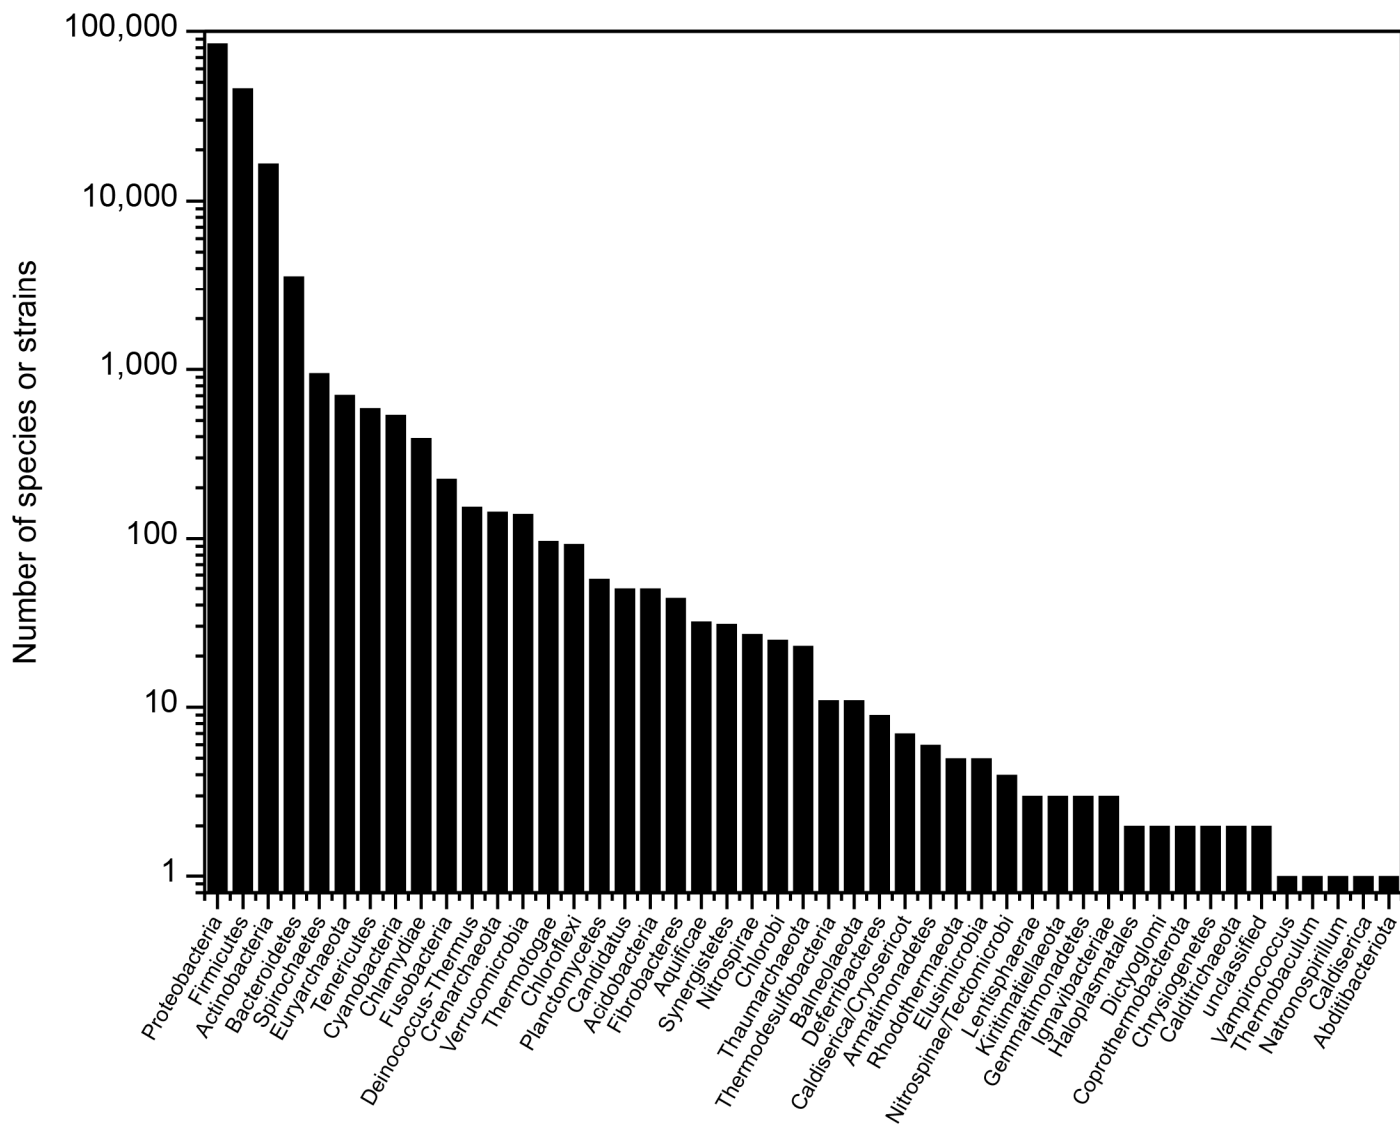

**Supplementary Figure S11.** An approximate maximum likelihood, midpoint rooted phylogenetic tree of LanC and LanC-like domains including human LanC-like proteins. The branches for the human LanC-like proteins are colored in red.

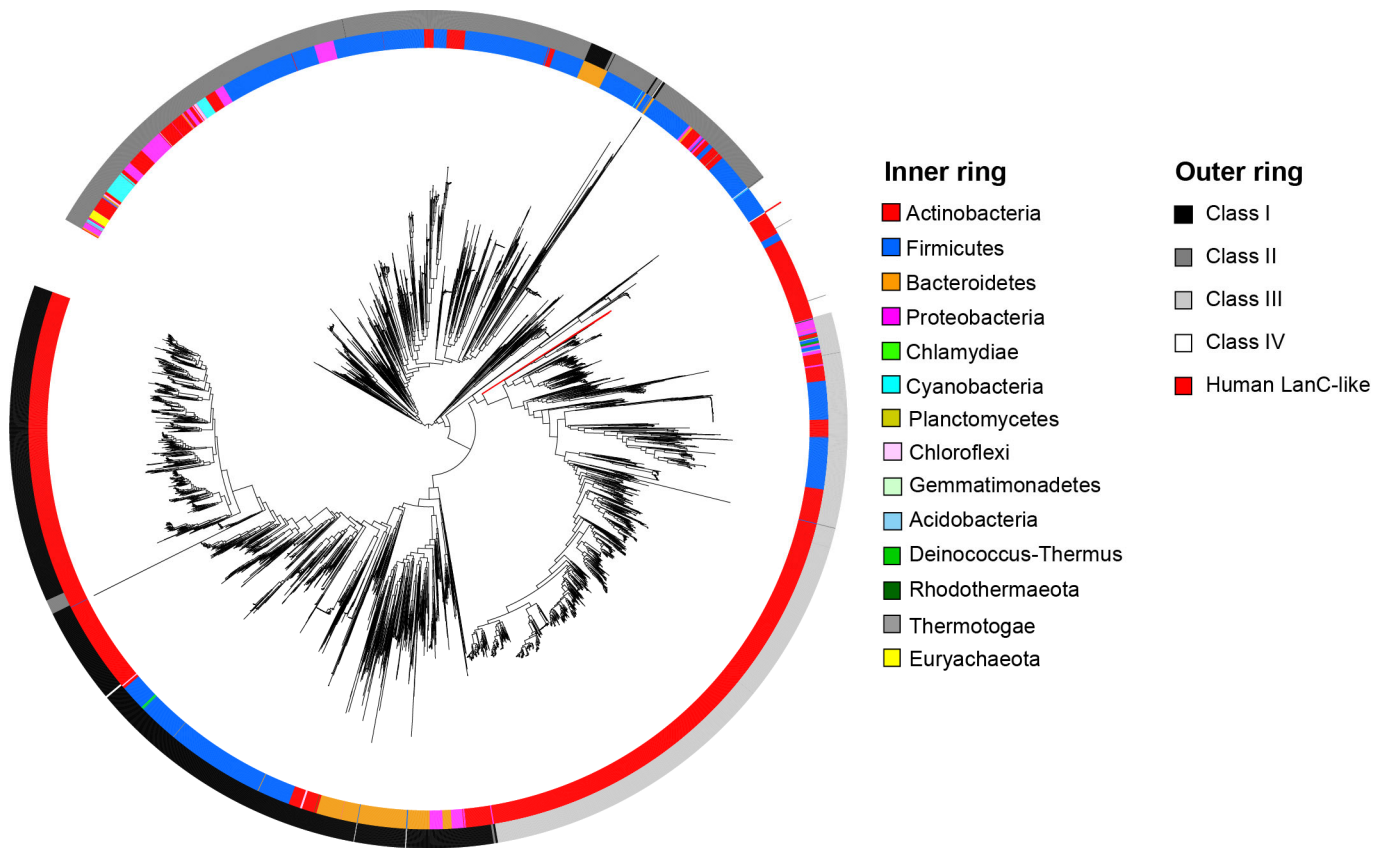

**Supplementary Figure S12.** GC content of clusters versus the cognate genome. The blue diagonal line is the linear regression with slope and intercept provided. Red points are the 10 greatest regression outliers. The box plot represents the differences between the cluster GC content and the genome GC content. The boxes indicate 1 standard deviation of the mean with the whiskers representing the maximum and minimum values.

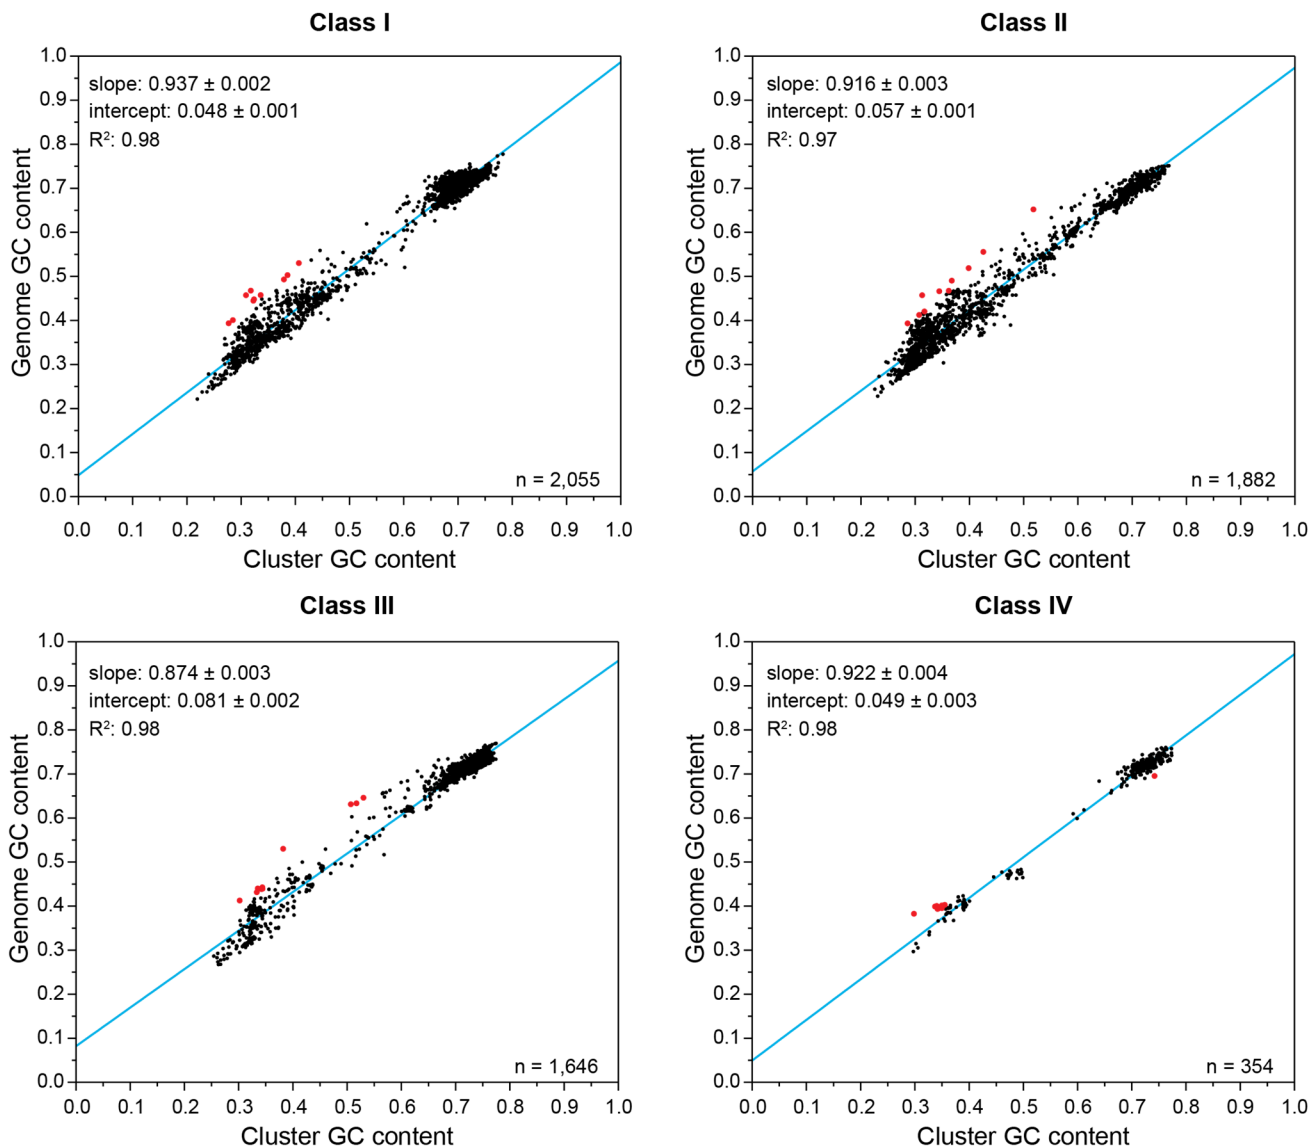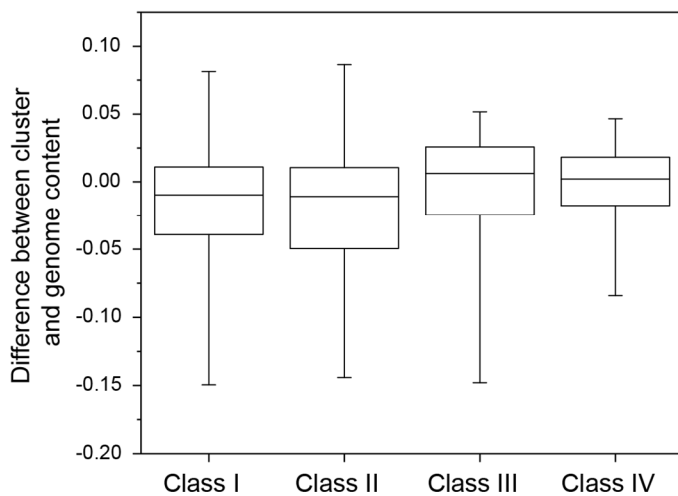

**Supplementary Figure S13.** ESI MS/MS and bioactivity of birimositide  $\alpha$  and  $\beta$ . A+B) Collision induced dissociation fragmentation spectrum of each peptide. The multiply-charged monoisotopic mass is boxed in blue. C) Peptides were screened against *Lactococcus lactis* sp. *cremoris* (left) and *Micrococcus luteus* ATCC 4698 (right). Red arrows indicate zones of growth inhibition.

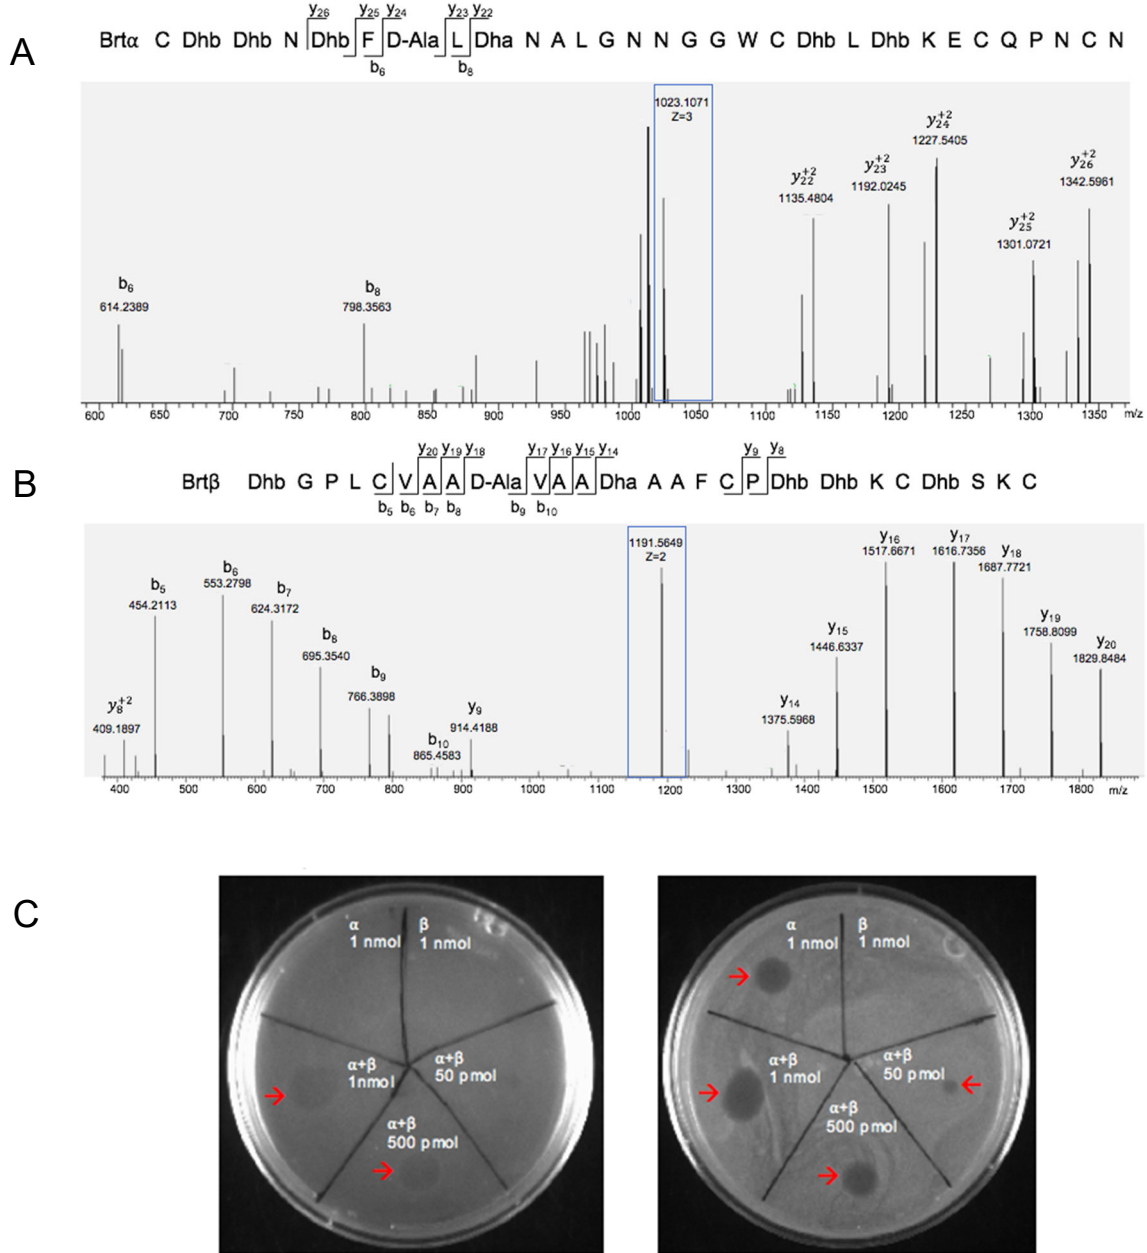

**Supplementary Table S12.** Expected and observed monoisotopic masses for Brt $\alpha$  and Brt $\beta$  using orbitrap ESI MS/MS.

| Ion                                                             | Predicted (m/z) | Observed (m/z) | Error (ppm) |
|-----------------------------------------------------------------|-----------------|----------------|-------------|
| (Brt $\alpha$ + 3H) <sup>3+</sup>                               | 1023.1071       | 1023.1071      | 0.0000      |
| (Brt $\alpha$ + 3H) <sup>3+</sup> y <sub>26</sub> <sup>+2</sup> | 1342.5938       | 1342.5961      | -1.7131     |
| (Brt $\alpha$ + 3H) <sup>3+</sup> y <sub>25</sub> <sup>+2</sup> | 1301.0752       | 1301.0721      | 2.3826      |
| (Brt $\alpha$ + 3H) <sup>3+</sup> y <sub>24</sub> <sup>+2</sup> | 1227.5410       | 1227.5405      | 0.4073      |
| (Brt $\alpha$ + 3H) <sup>3+</sup> y <sub>23</sub> <sup>+2</sup> | 1192.0225       | 1192.0245      | -1.6778     |
| (Brt $\alpha$ + 3H) <sup>3+</sup> y <sub>22</sub> <sup>+2</sup> | 1135.4804       | 1135.4804      | 0.0000      |
| (Brt $\alpha$ + 3H) <sup>3+</sup> b <sub>8</sub>                | 798.3603        | 798.3563       | 5.0103      |
| (Brt $\alpha$ + 3H) <sup>3+</sup> b <sub>6</sub>                | 614.2391        | 614.2389       | 0.3256      |
| (Brt $\beta$ + 2H) <sup>2+</sup>                                | 1191.5649       | 1191.5649      | 0.0000      |
| (Brt $\beta$ + 2H) <sup>2+</sup> y <sub>20</sub>                | 1829.8495       | 1829.8484      | 0.6011      |
| (Brt $\beta$ + 2H) <sup>2+</sup> y <sub>19</sub>                | 1758.8124       | 1758.8099      | 1.4214      |
| (Brt $\beta$ + 2H) <sup>2+</sup> y <sub>18</sub>                | 1687.7753       | 1687.7721      | 1.8960      |
| (Brt $\beta$ + 2H) <sup>2+</sup> y <sub>17</sub>                | 1616.7382       | 1616.7356      | 1.6082      |
| (Brt $\beta$ + 2H) <sup>2+</sup> y <sub>16</sub>                | 1517.6698       | 1517.6671      | 1.7790      |
| (Brt $\beta$ + 2H) <sup>2+</sup> y <sub>15</sub>                | 1446.6327       | 1446.6337      | -0.6913     |
| (Brt $\beta$ + 2H) <sup>2+</sup> y <sub>14</sub>                | 1375.5956       | 1375.5968      | -0.8723     |
| (Brt $\beta$ + 2H) <sup>2+</sup> y <sub>9</sub>                 | 914.4223        | 914.4188       | 3.8276      |
| (Brt $\beta$ + 2H) <sup>2+</sup> b <sub>10</sub>                | 865.4600        | 865.4583       | 1.9643      |
| (Brt $\beta$ + 2H) <sup>2+</sup> b <sub>9</sub>                 | 766.3916        | 766.3898       | 2.3487      |
| (Brt $\beta$ + 2H) <sup>2+</sup> b <sub>8</sub>                 | 695.3545        | 695.3540       | 0.7191      |
| (Brt $\beta$ + 2H) <sup>2+</sup> b <sub>7</sub>                 | 624.3174        | 624.3172       | 0.3203      |
| (Brt $\beta$ + 2H) <sup>2+</sup> b <sub>6</sub>                 | 553.2803        | 553.2798       | 0.9037      |
| (Brt $\beta$ + 2H) <sup>2+</sup> b <sub>5</sub>                 | 454.2119        | 454.2113       | 1.3210      |
| (Brt $\beta$ + 2H) <sup>2+</sup> y <sub>8</sub> <sup>+2</sup>   | 409.1884        | 409.1897       | -3.1770     |

## References

1. Grant CE, Bailey TL, Noble WS: **FIMO: Scanning for occurrences of a given motif.** *Bioinformatics* 2011, **27**(7):1017-1018.
2. van der Meer JR, Rollema HS, Siezen RJ, Beerthuyzen MM, Kuipers OP, de Vos WM: **Influence of amino acid substitutions in the nisin leader peptide on biosynthesis and secretion of nisin by *Lactococcus lactis*.** *J Biol Chem* 1994, **269**(5):3555-3562.
3. Patton GC, Paul M, Cooper LE, Chatterjee C, van der Donk WA: **The importance of the leader sequence for directing lanthionine formation in lactacin 481.** *Biochemistry* 2008, **47**(28):7342-7351.
4. Müller WM, Enslé P, Krawczyk B, Süßmuth RD: **Leader peptide-directed processing of labyrinthopeptin A2 precursor peptide by the modifying enzyme LabKC.** *Biochemistry* 2011, **50**(39):8362-8373.
5. Hegemann JD, van der Donk WA: **Investigation of substrate recognition and biosynthesis in class IV lanthipeptide systems.** *J Am Chem Soc* 2018, **140**(17):5743-5754.
6. Zallot R, Oberg NO, Gerlt JA: **'Democratized' genomic enzymology web tools for functional assignment.** *Curr Opin Chem Biol* 2018, **47**:77-85.
7. Shannon P, Markiel A, Ozier O, Baliga NS, Wang JT, Ramage D, Amin N, Schwikowski B, Ideker T: **Cytoscape: a software environment for integrated models of biomolecular interaction networks.** *Genome Res* 2003, **13**(11):2498-2504.
8. Medema MH, Kottmann R, Yilmaz P, Cummings M, Biggins JB, Blin K, de Bruijn I, Chooi YH, Claesen J, Coates RC *et al*: **Minimum Information about a Biosynthetic Gene cluster.** *Nat Chem Biol* 2015, **11**(9):625-631.
9. van Heel AJ, de Jong A, Song C, Viel JH, Kok J, Kuipers OP: **BAGEL4: a user-friendly web server to thoroughly mine RiPPs and bacteriocins.** *Nucleic Acids Res* 2018, **46**(W1):W278-w281.
10. Crooks GE, Hon G, Chandonia JM, Brenner SE: **WebLogo: a sequence logo generator.** *Genome Res* 2004, **14**(6):1188-1190.
